# Supplementary material for: The design and synthesis of an α-Gal trisaccharide epitope that provides a highly specific anti-Gal immune response
Source: Royal Society of Chemistry journal article supplement (doi:10.1039/c7ob00448f), 2017-01-01

## Supplementary Information 1

### The design and synthesis of an $\alpha$ -Gal trisaccharide epitope that provides a highly specific anti-Gal immune response

Kensaku Anraku, Shun Sato, Nicholas T. Jacob, Lisa M. Eubanks, Beverly A. Ellis and Kim D. Janda

| Contents :                                                                            | Page |
|---------------------------------------------------------------------------------------|------|
| Supplementary Figure 1 :                                                              | 2    |
| Supplementary Figure 2 :                                                              | 2    |
| <sup>1</sup> H NMR and <sup>13</sup> C spectra (compound <b>8-17</b> , <b>1-3</b> ) : | 3-26 |

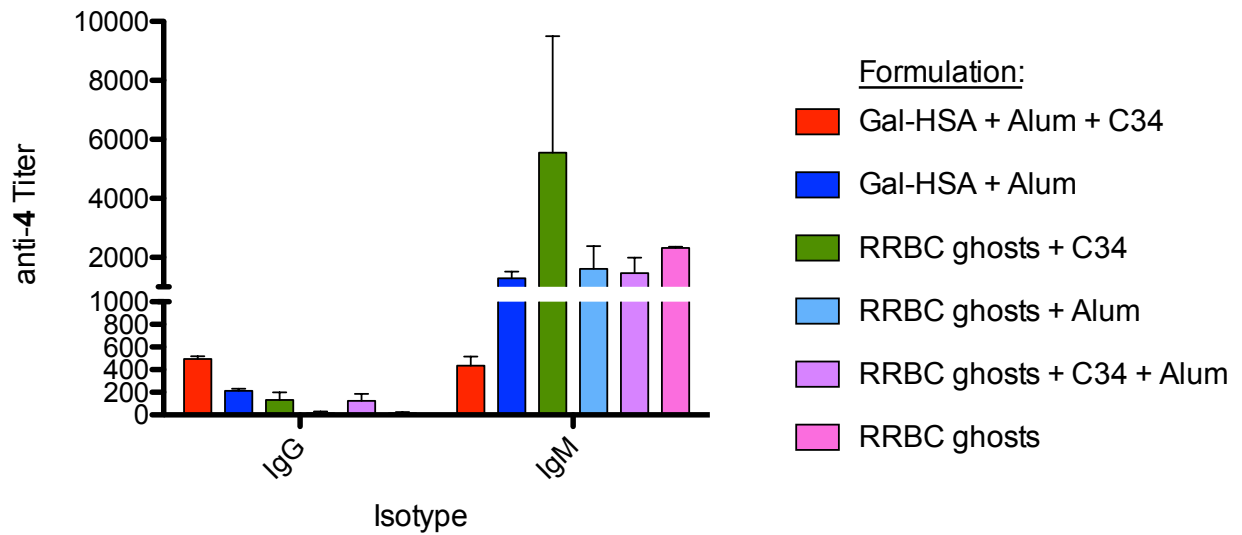

Supplementary Figure 1: ELISA titers of mice vaccinated with RRBC ghosts or an HAS glycoconjugate using C34 and alum as adjuvants. Hapten used: Gal $\alpha$ 1-3Gal $\beta$ 1-4GlcNAc-C3 (V-Labs, NGP2334).

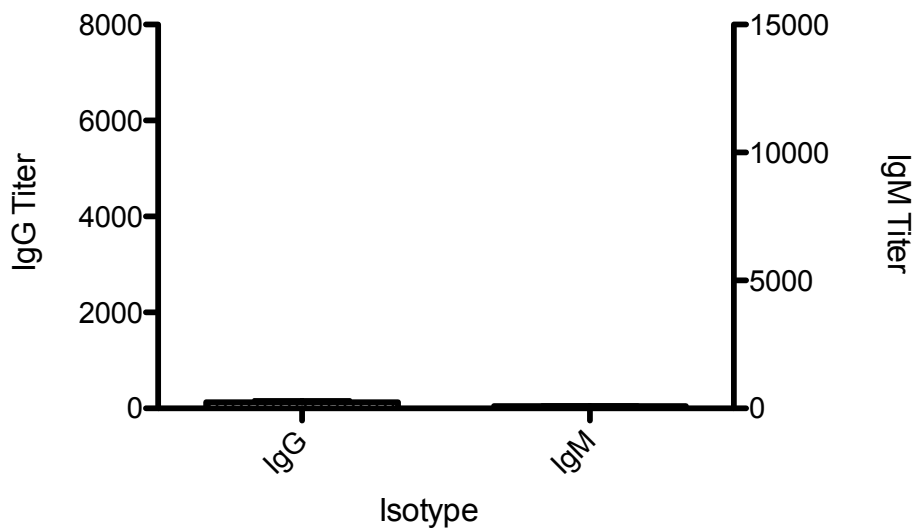

Supplementary Figure 2: Titers of sham vaccinated  $\alpha$ GalT-KO mice at 51 days. n = 5.

$^1\text{H}$ ,  $^{13}\text{C}$  NMR spectra (compound 8-17, 1-3)

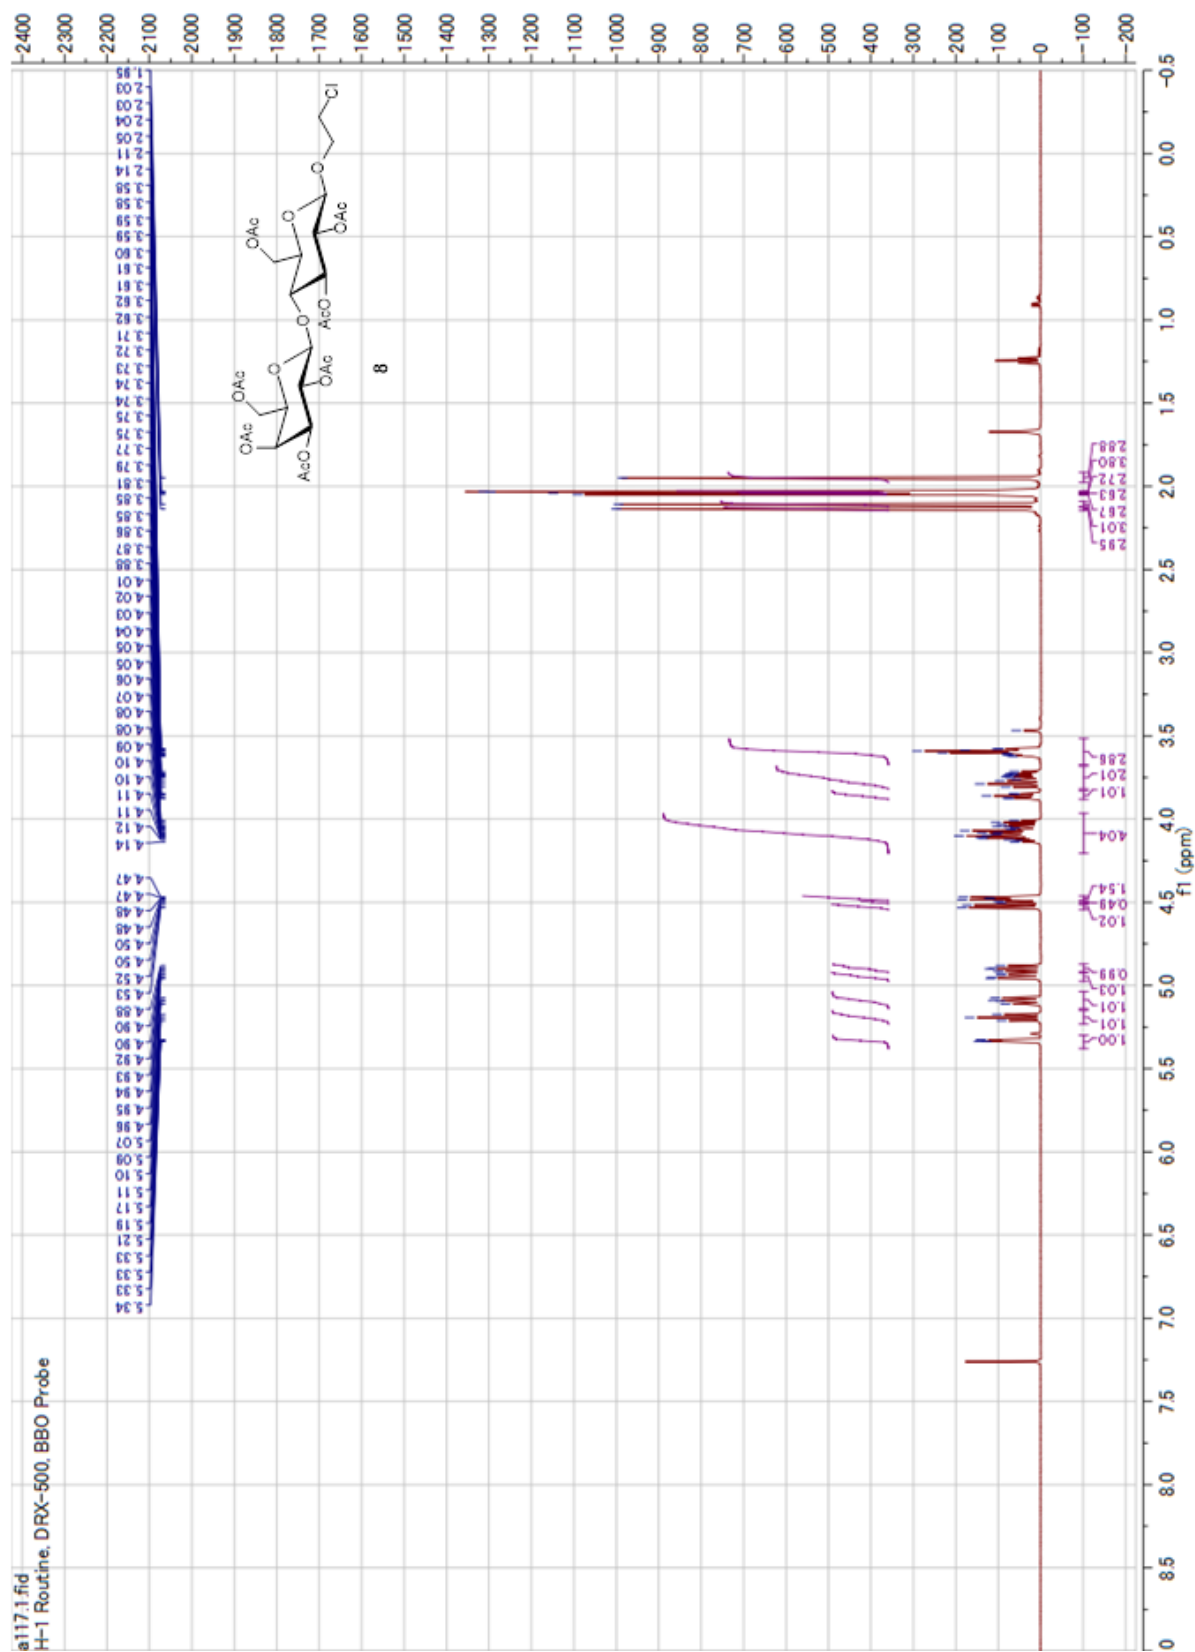

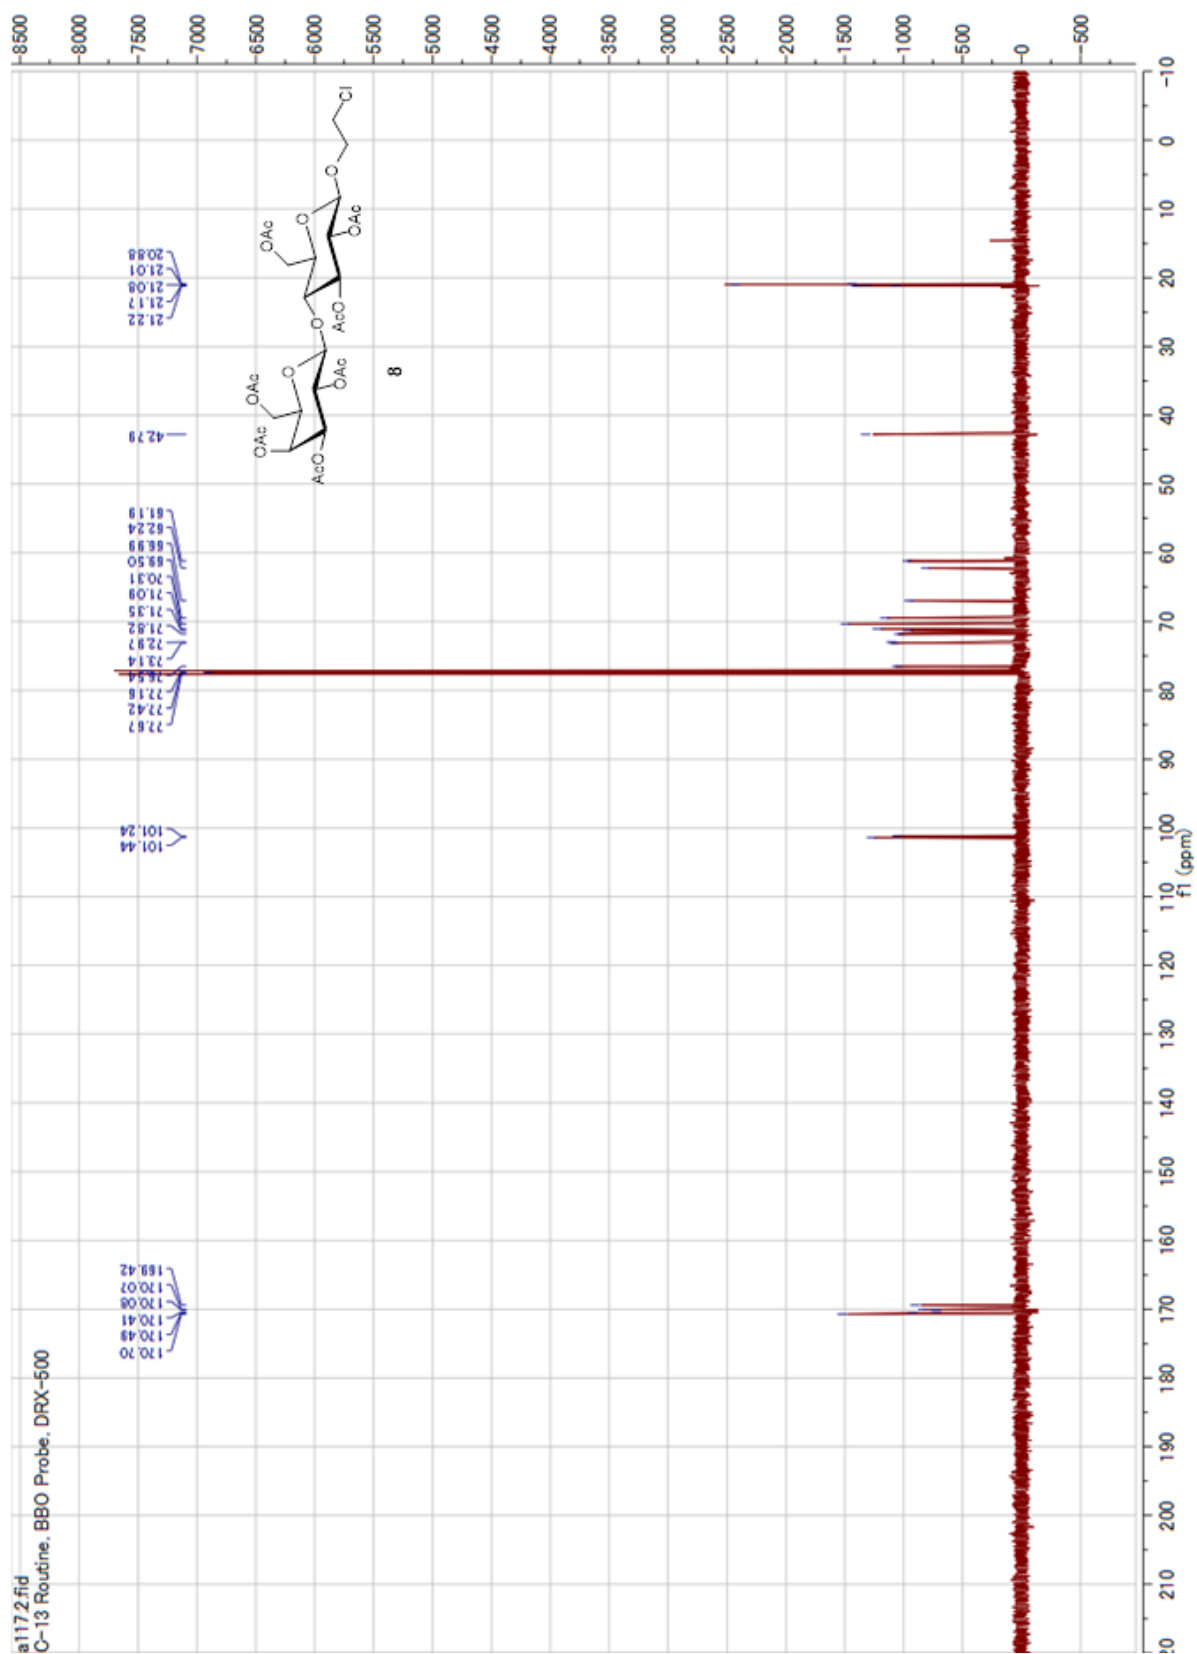

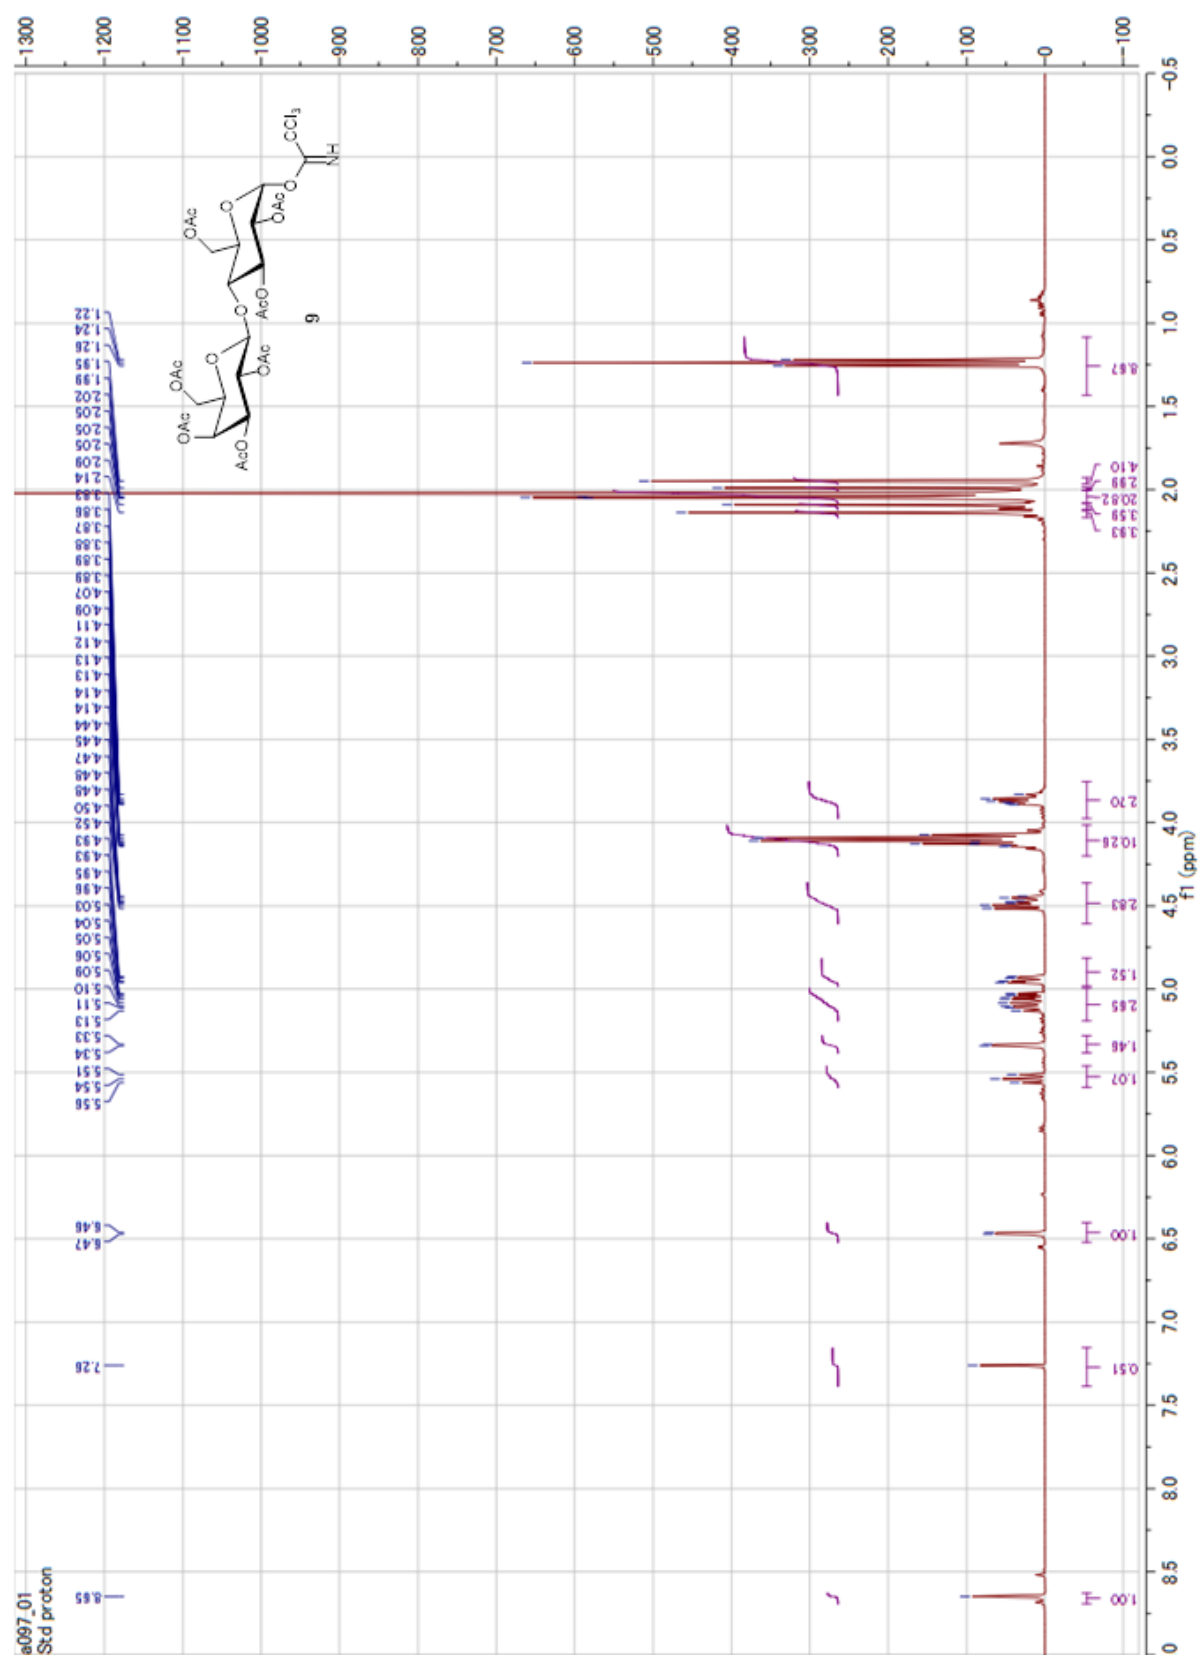



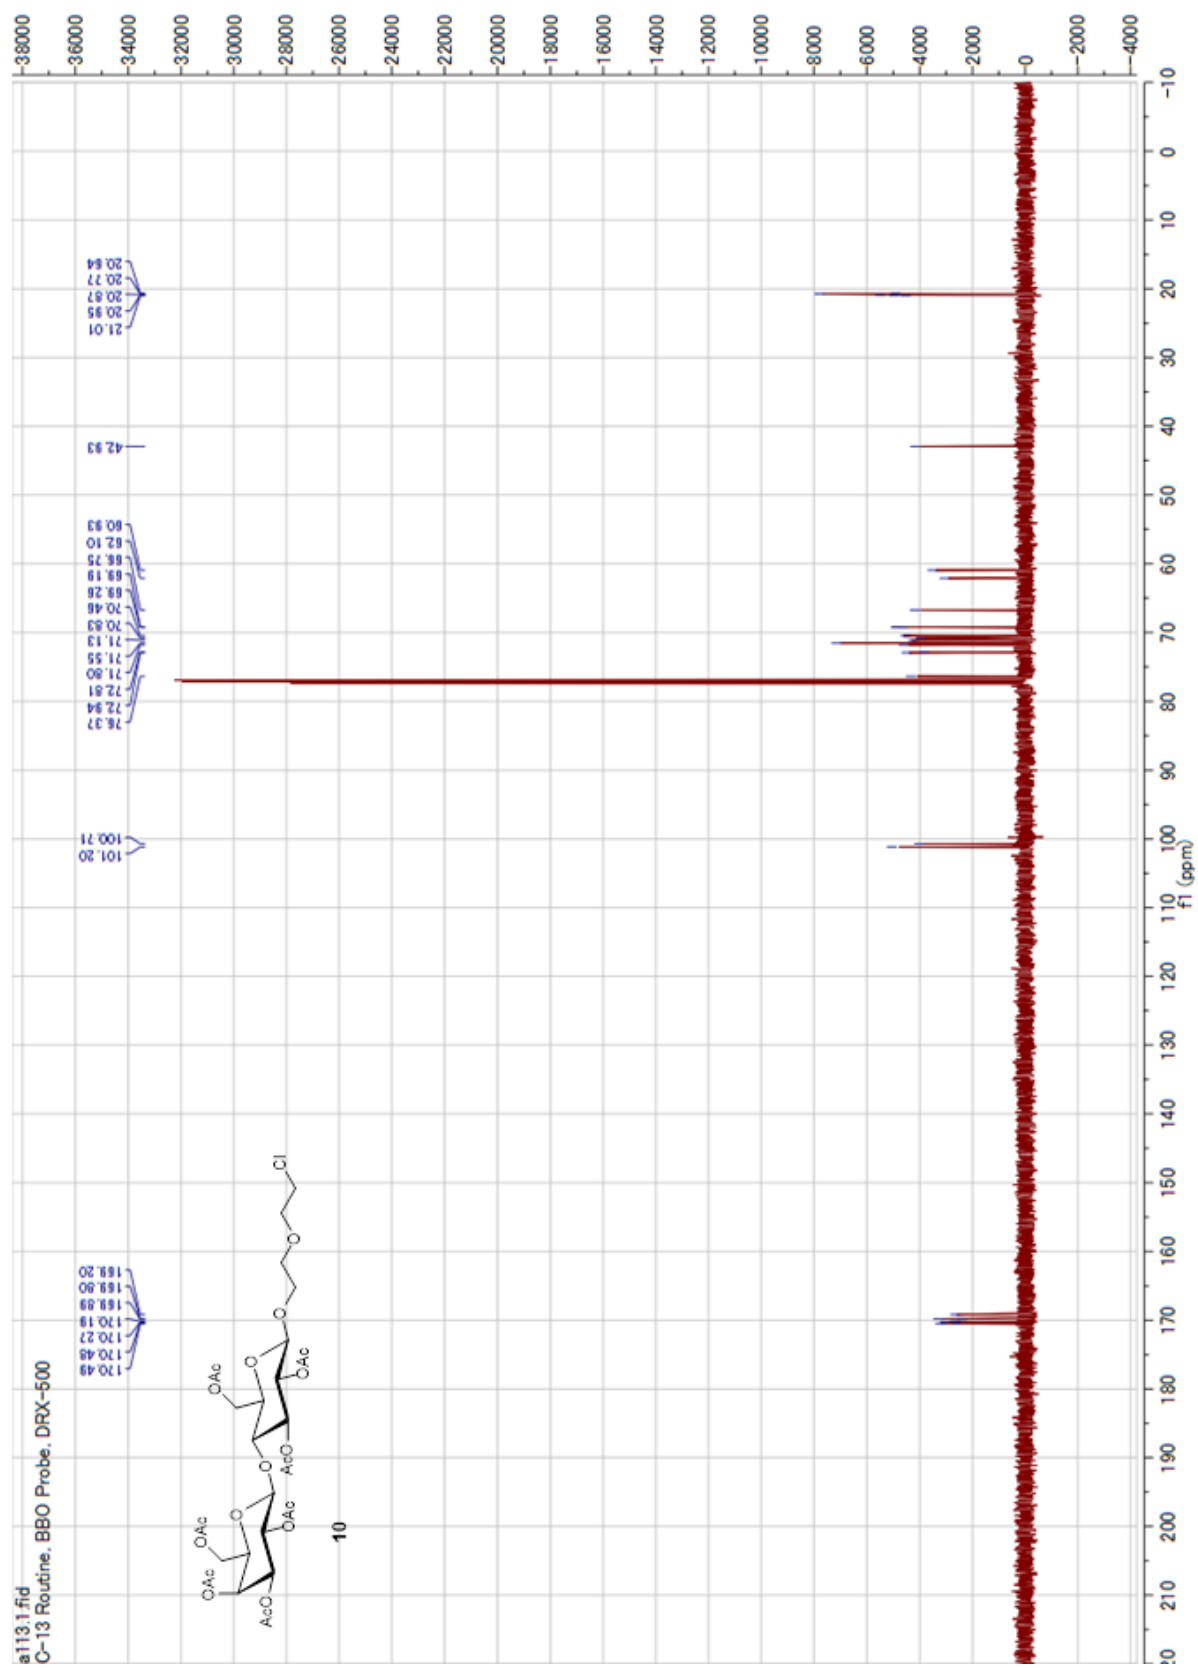





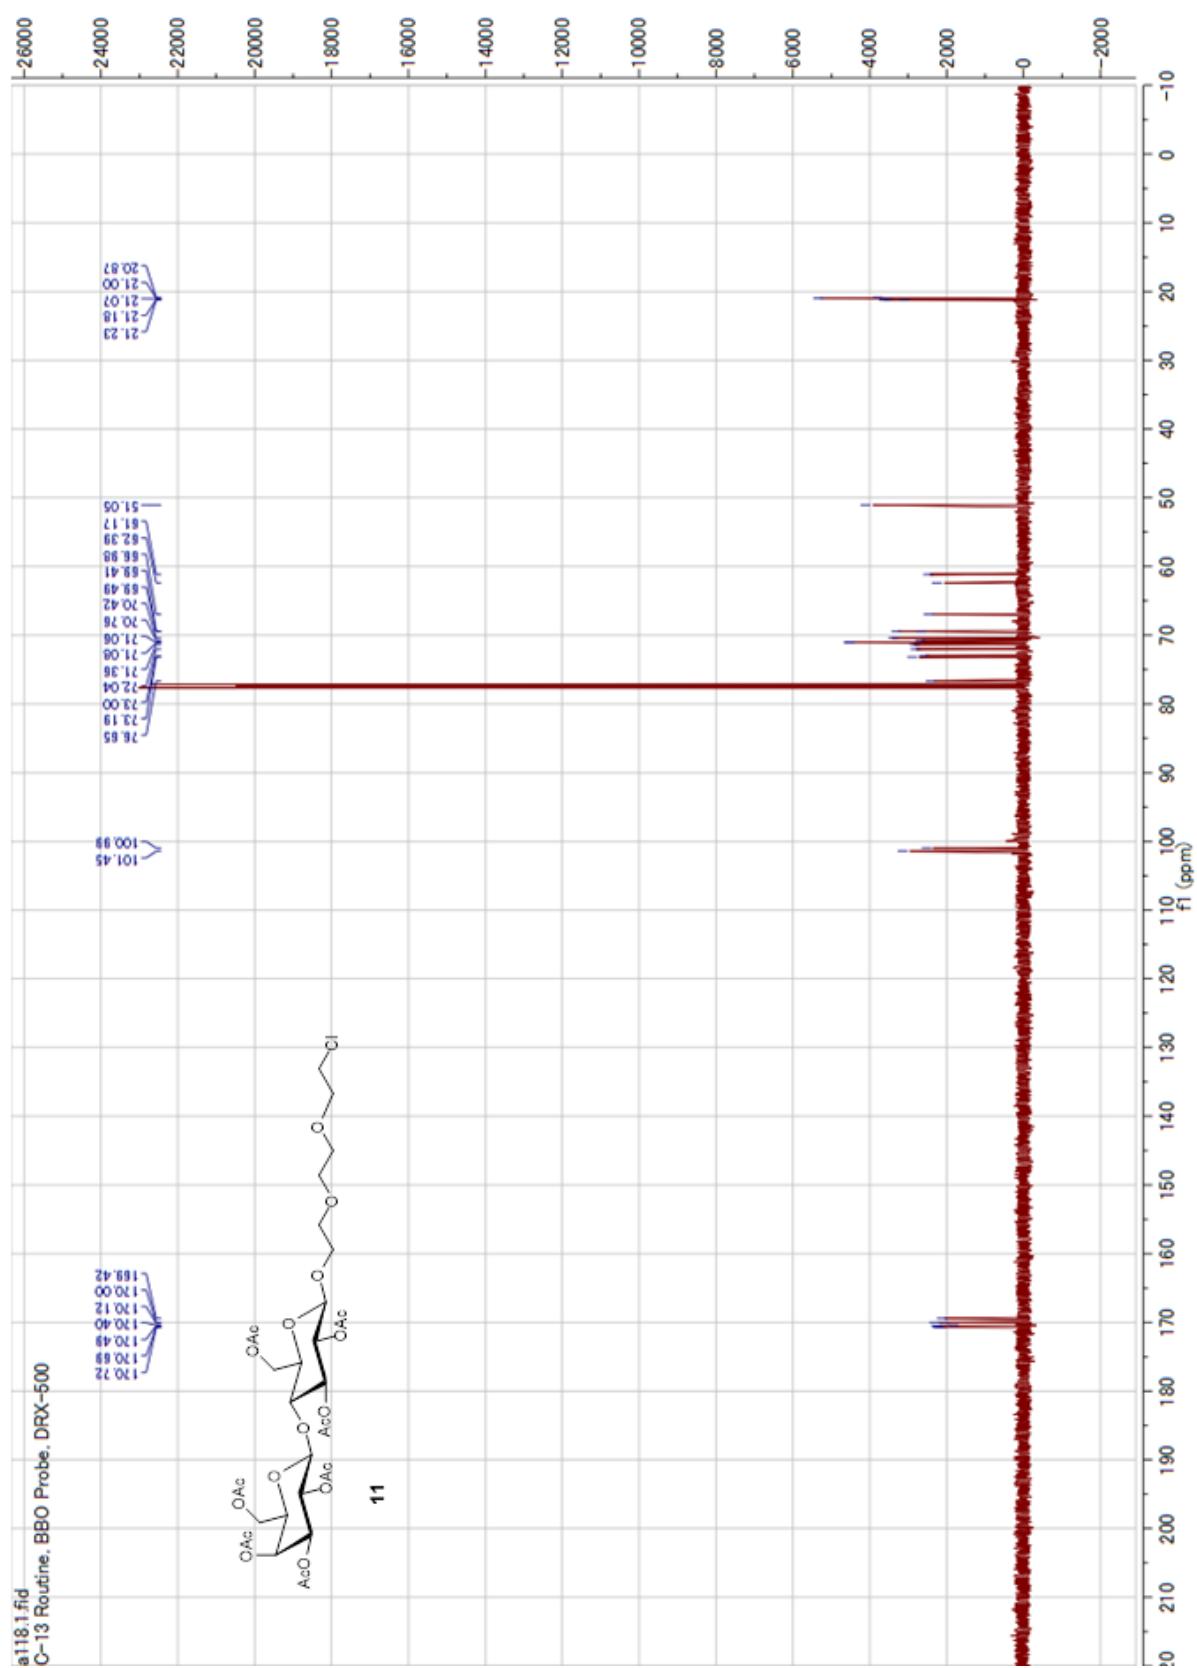

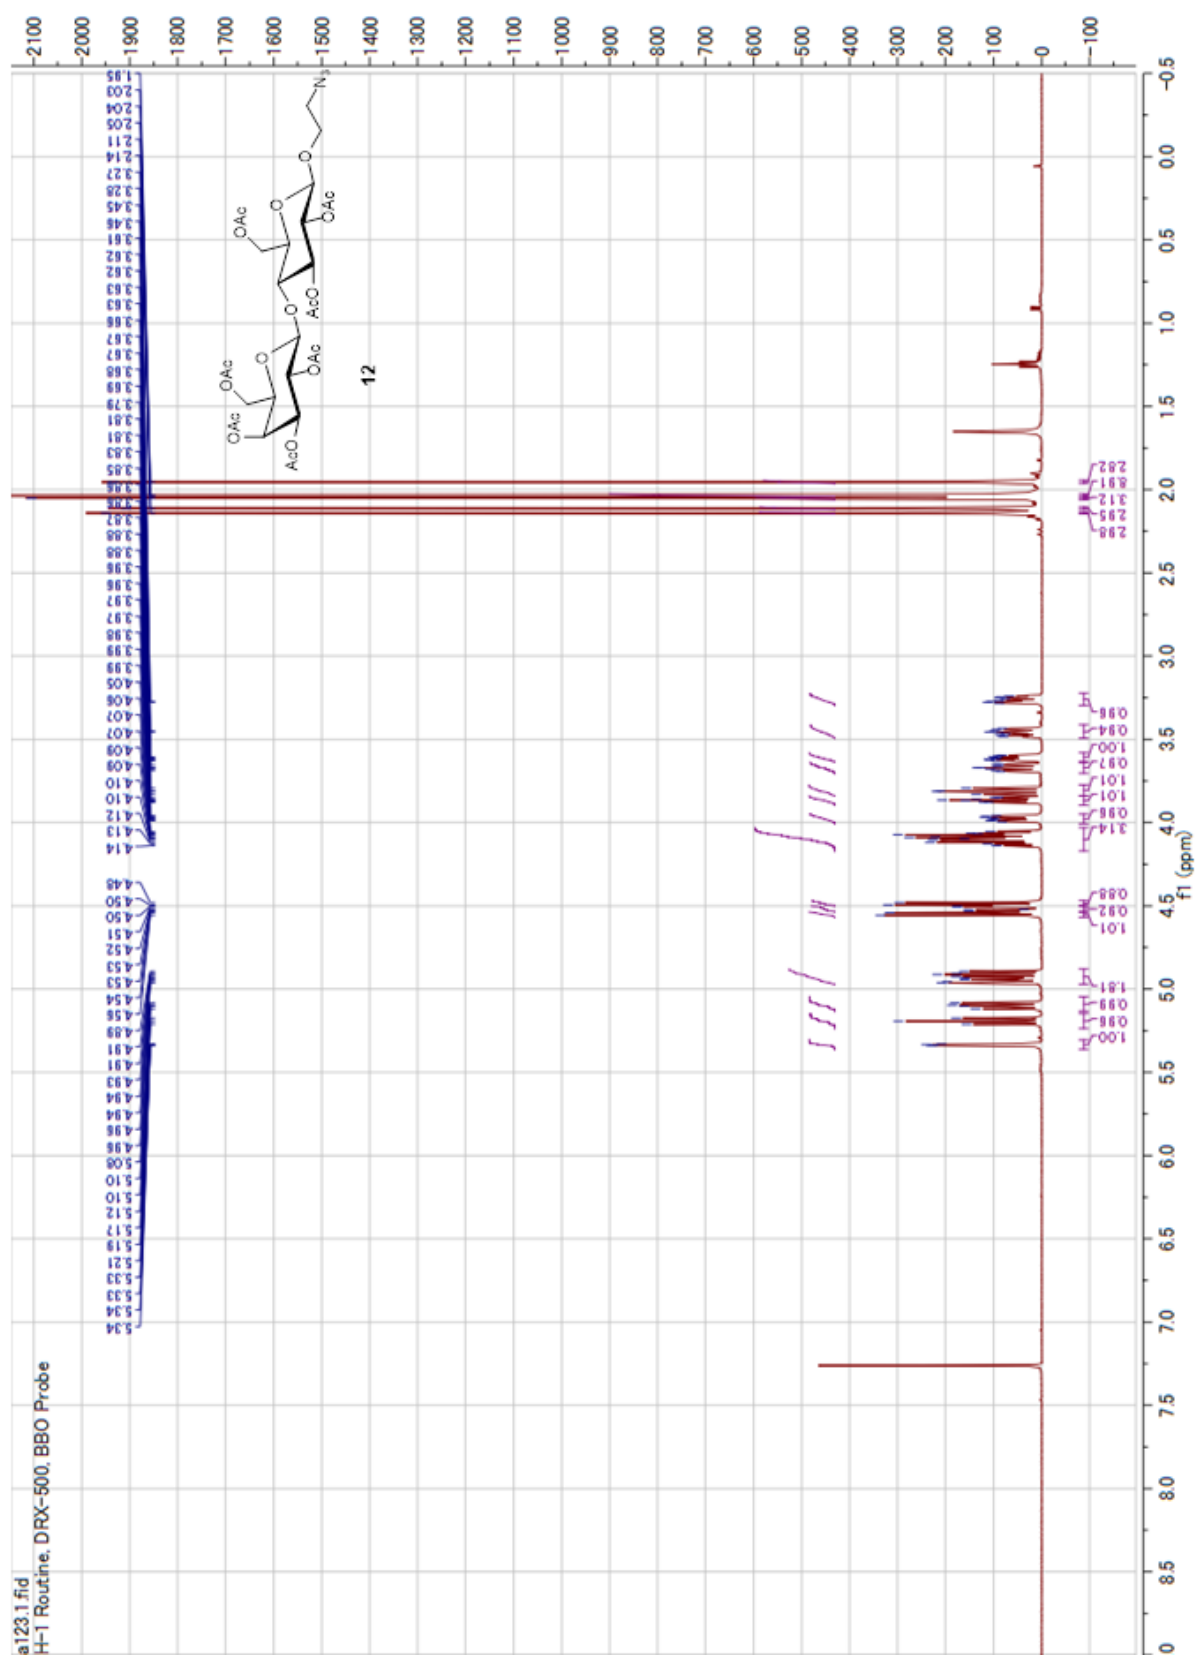

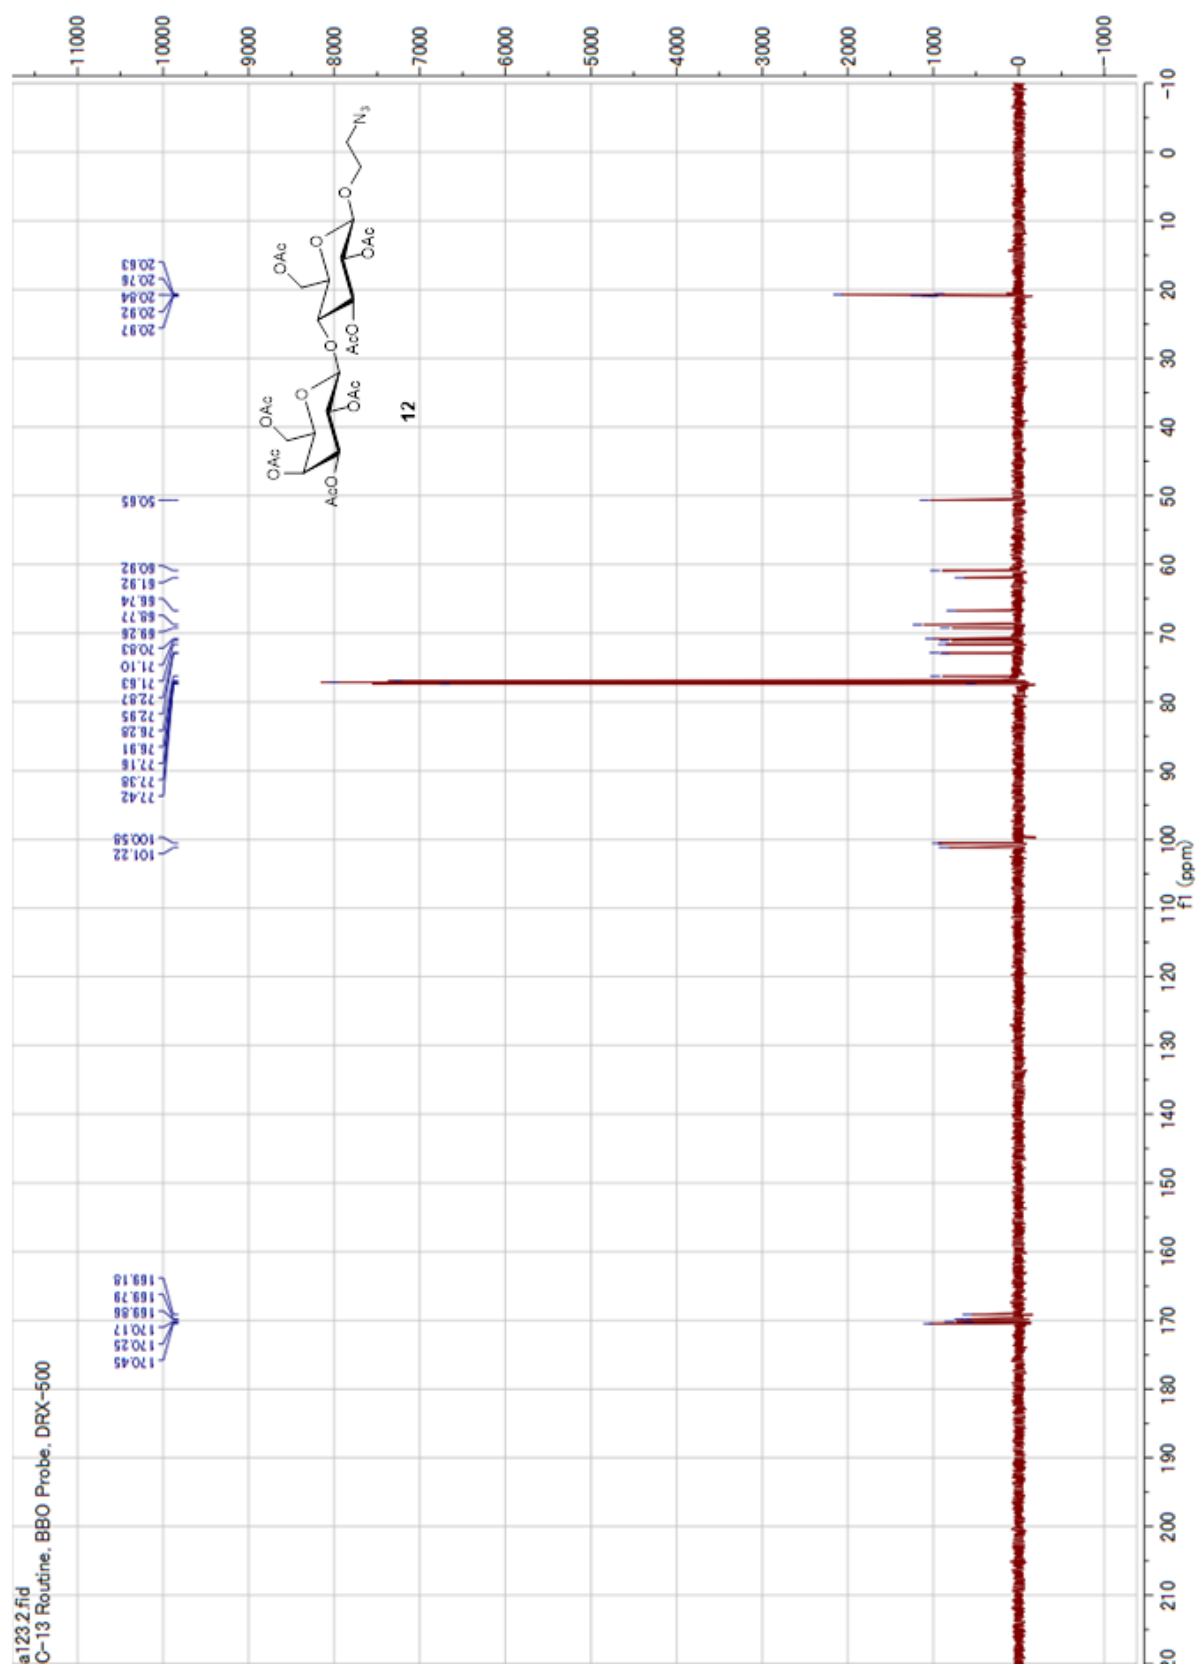



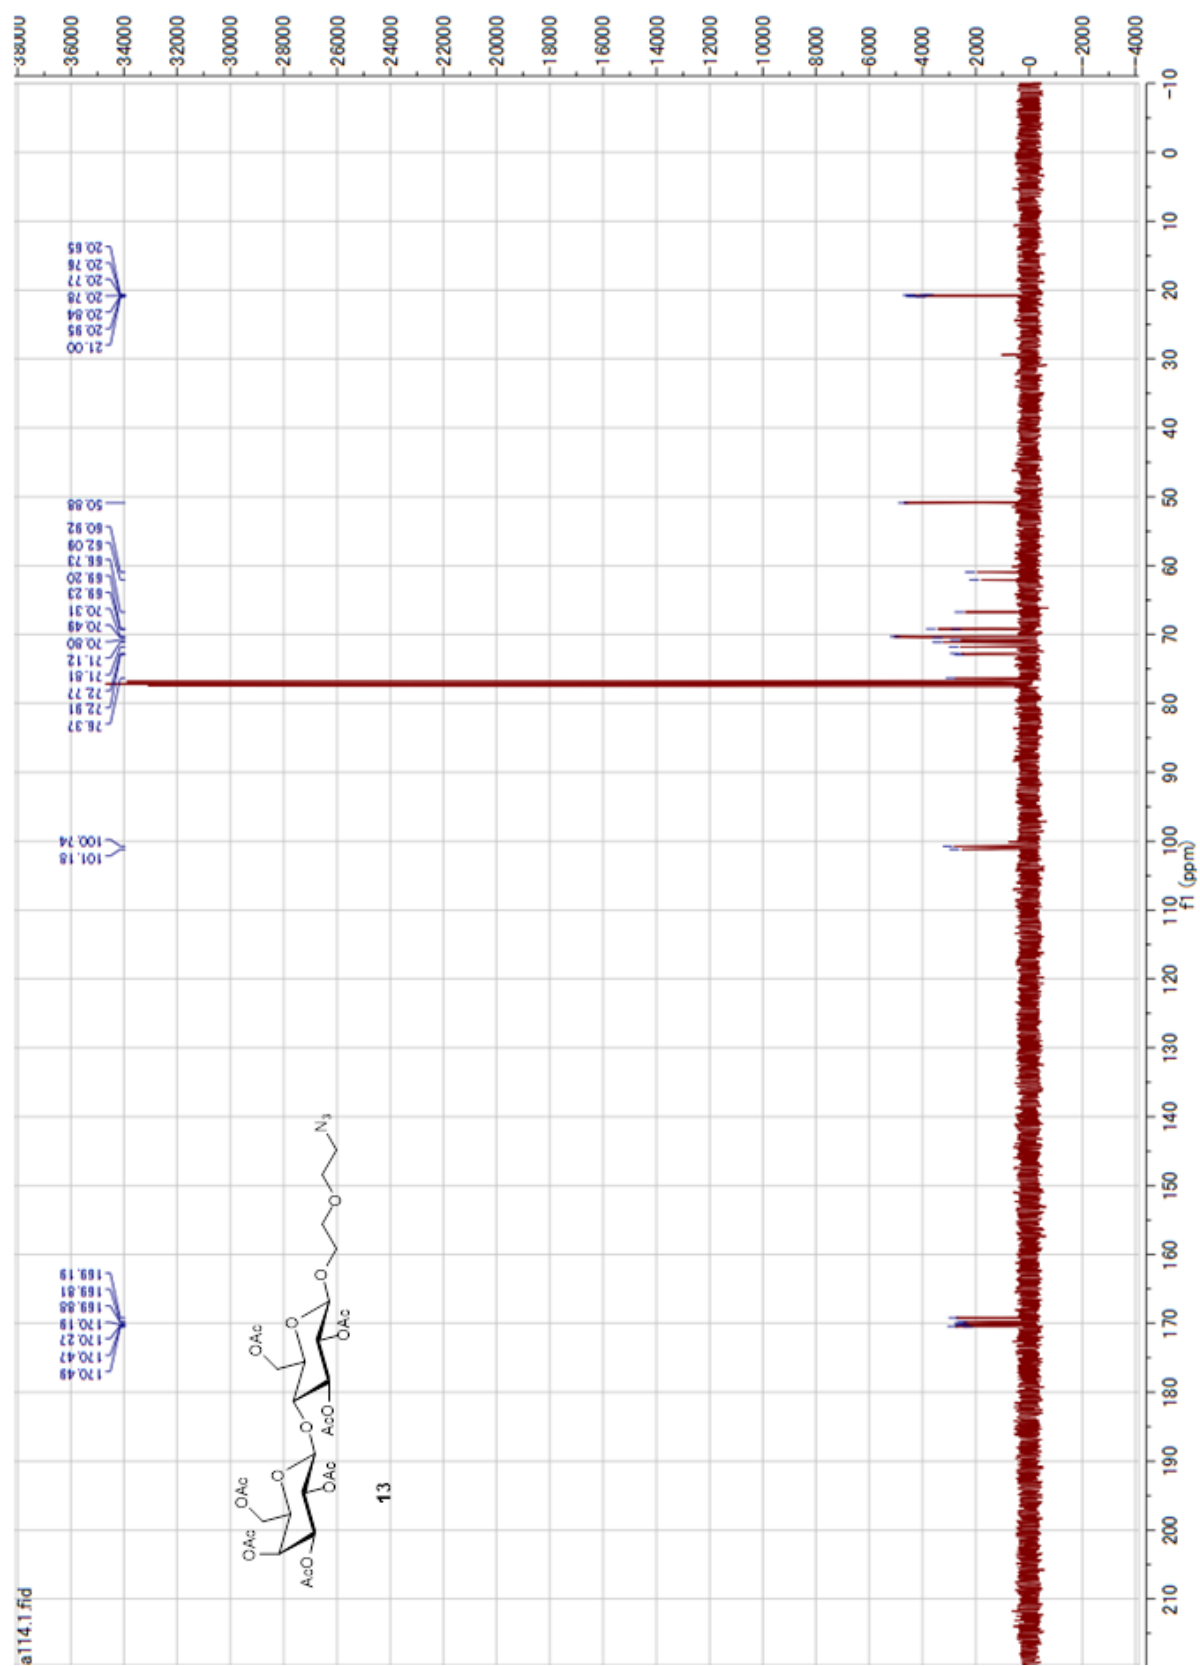

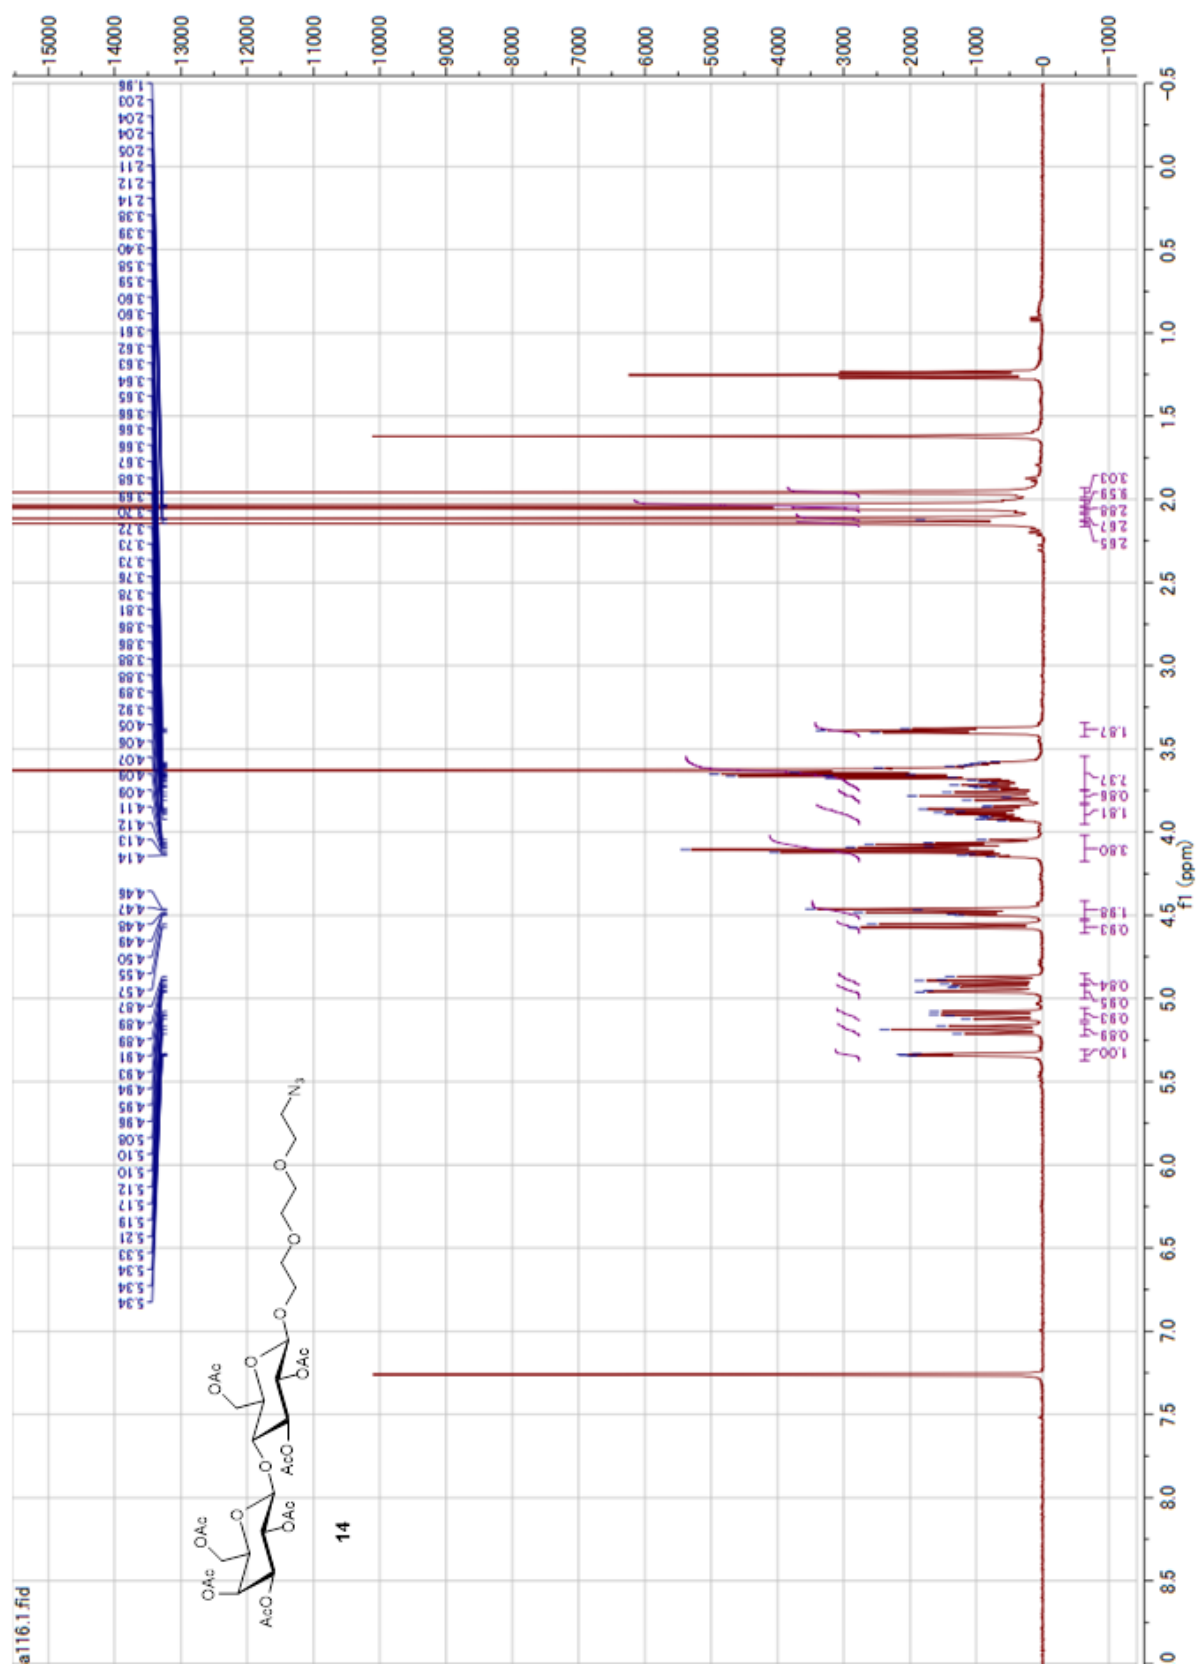

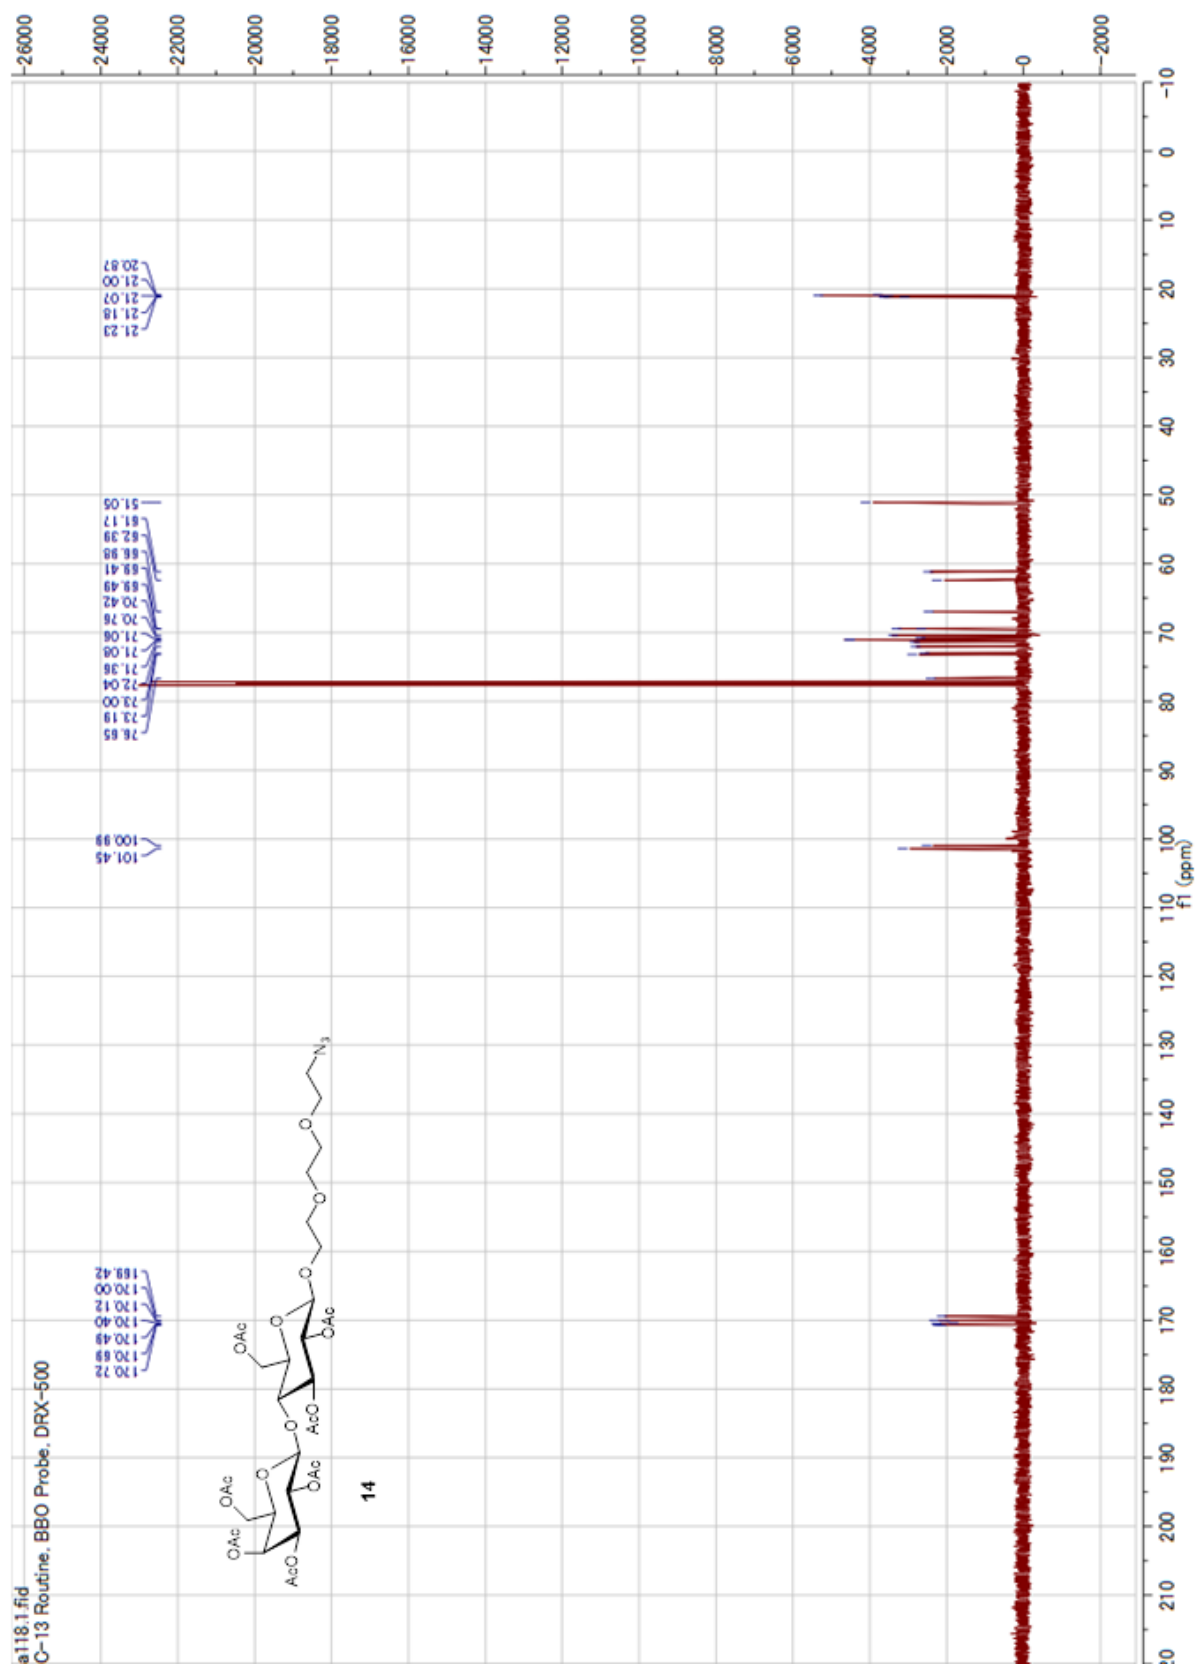

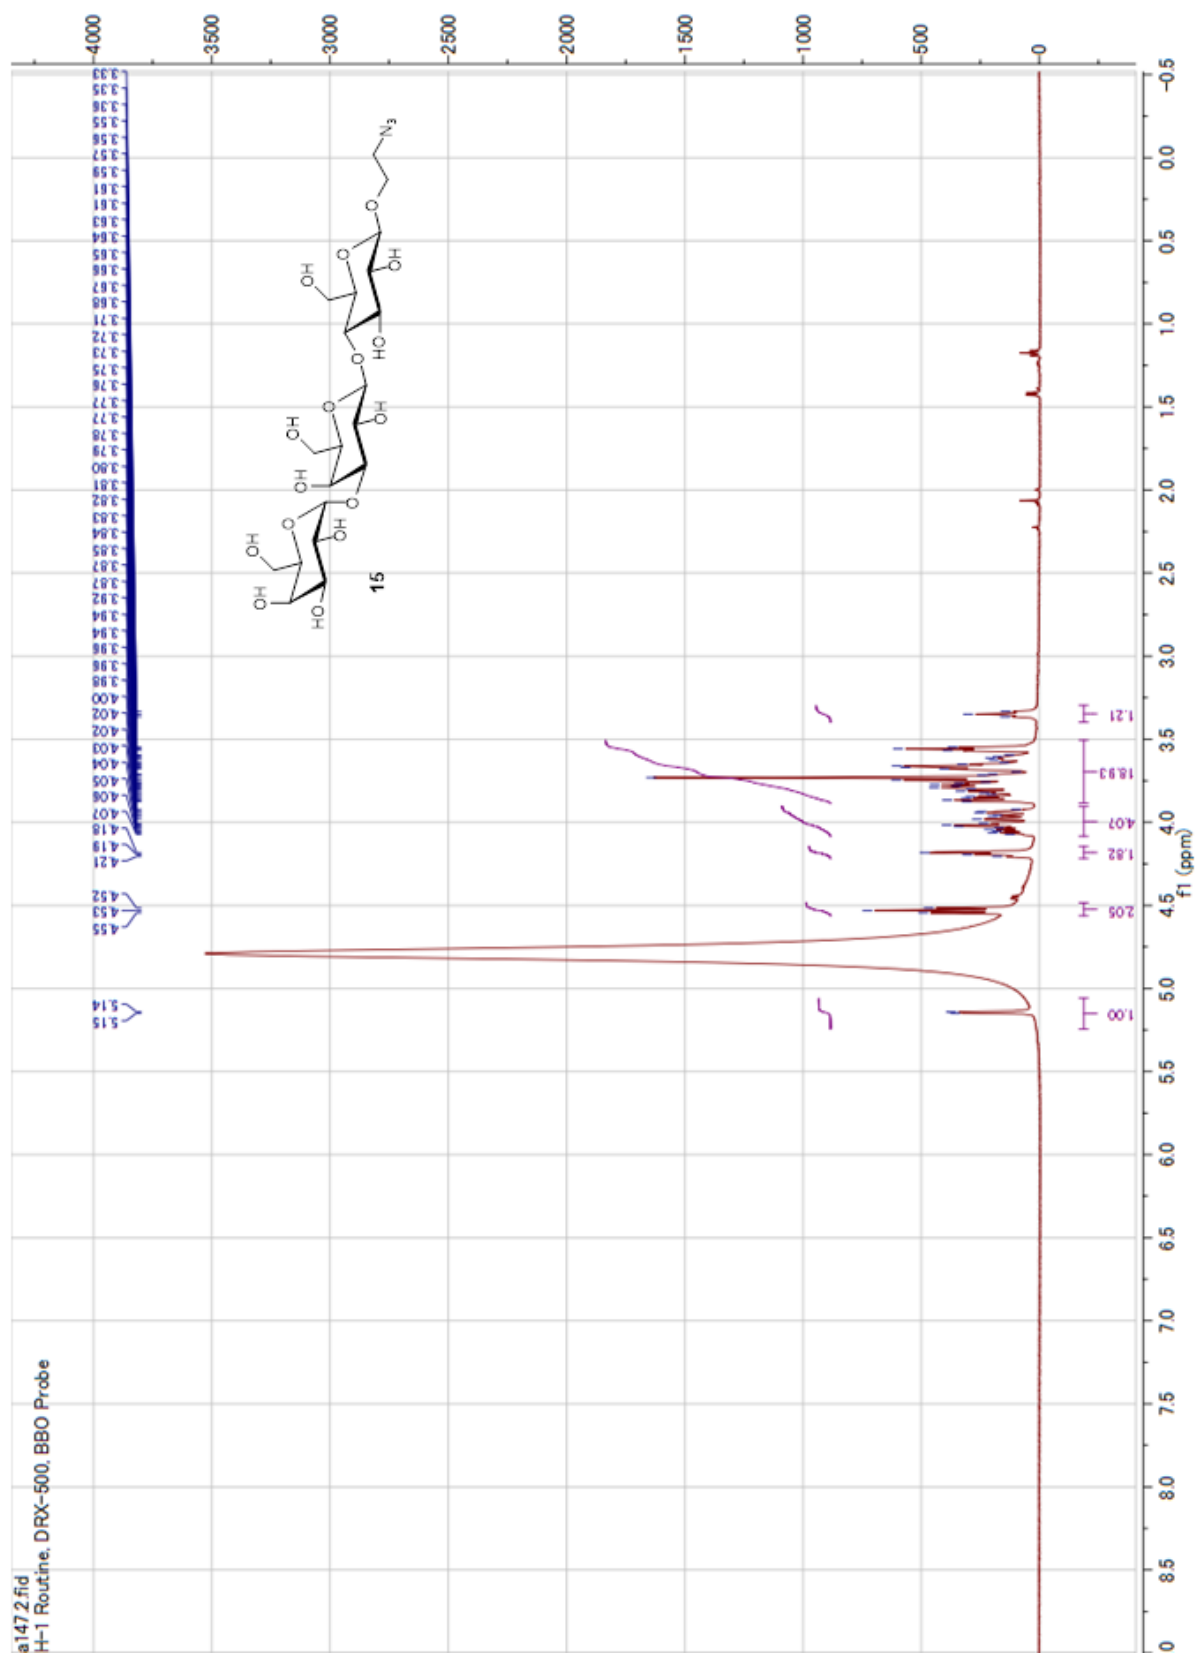



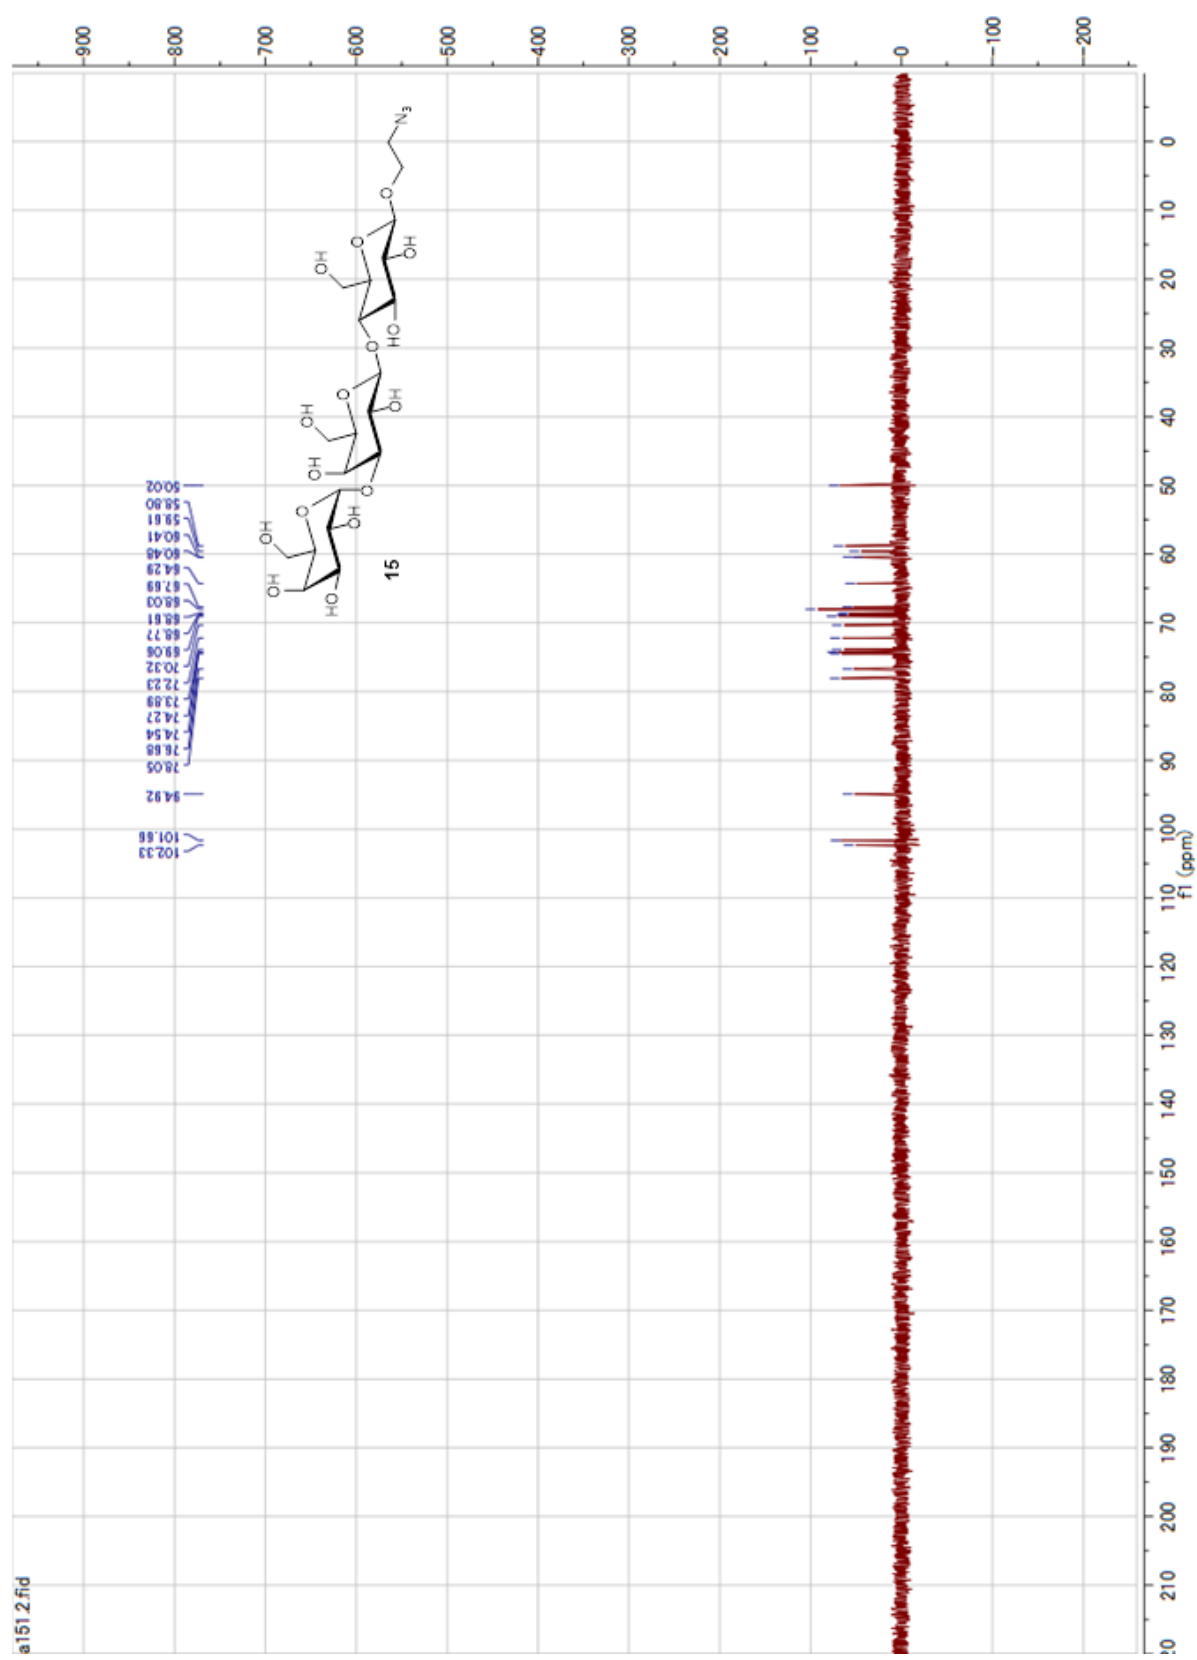

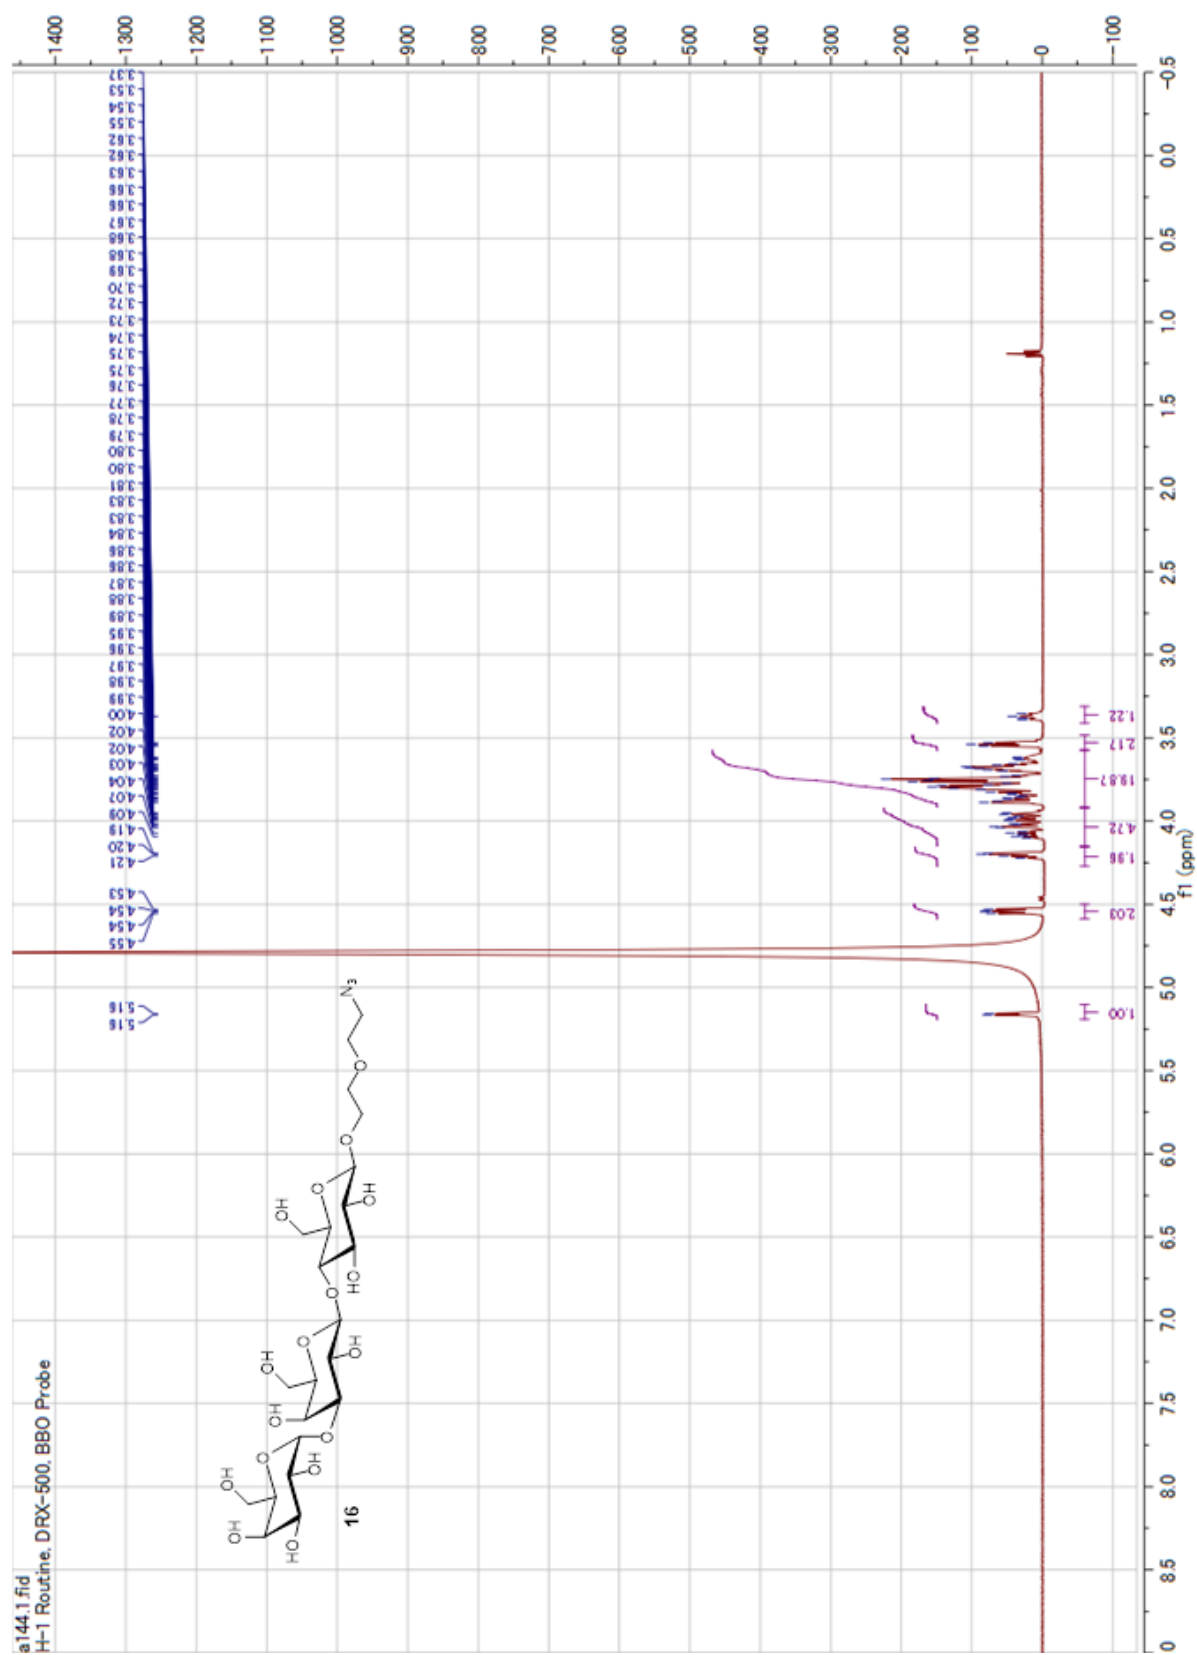

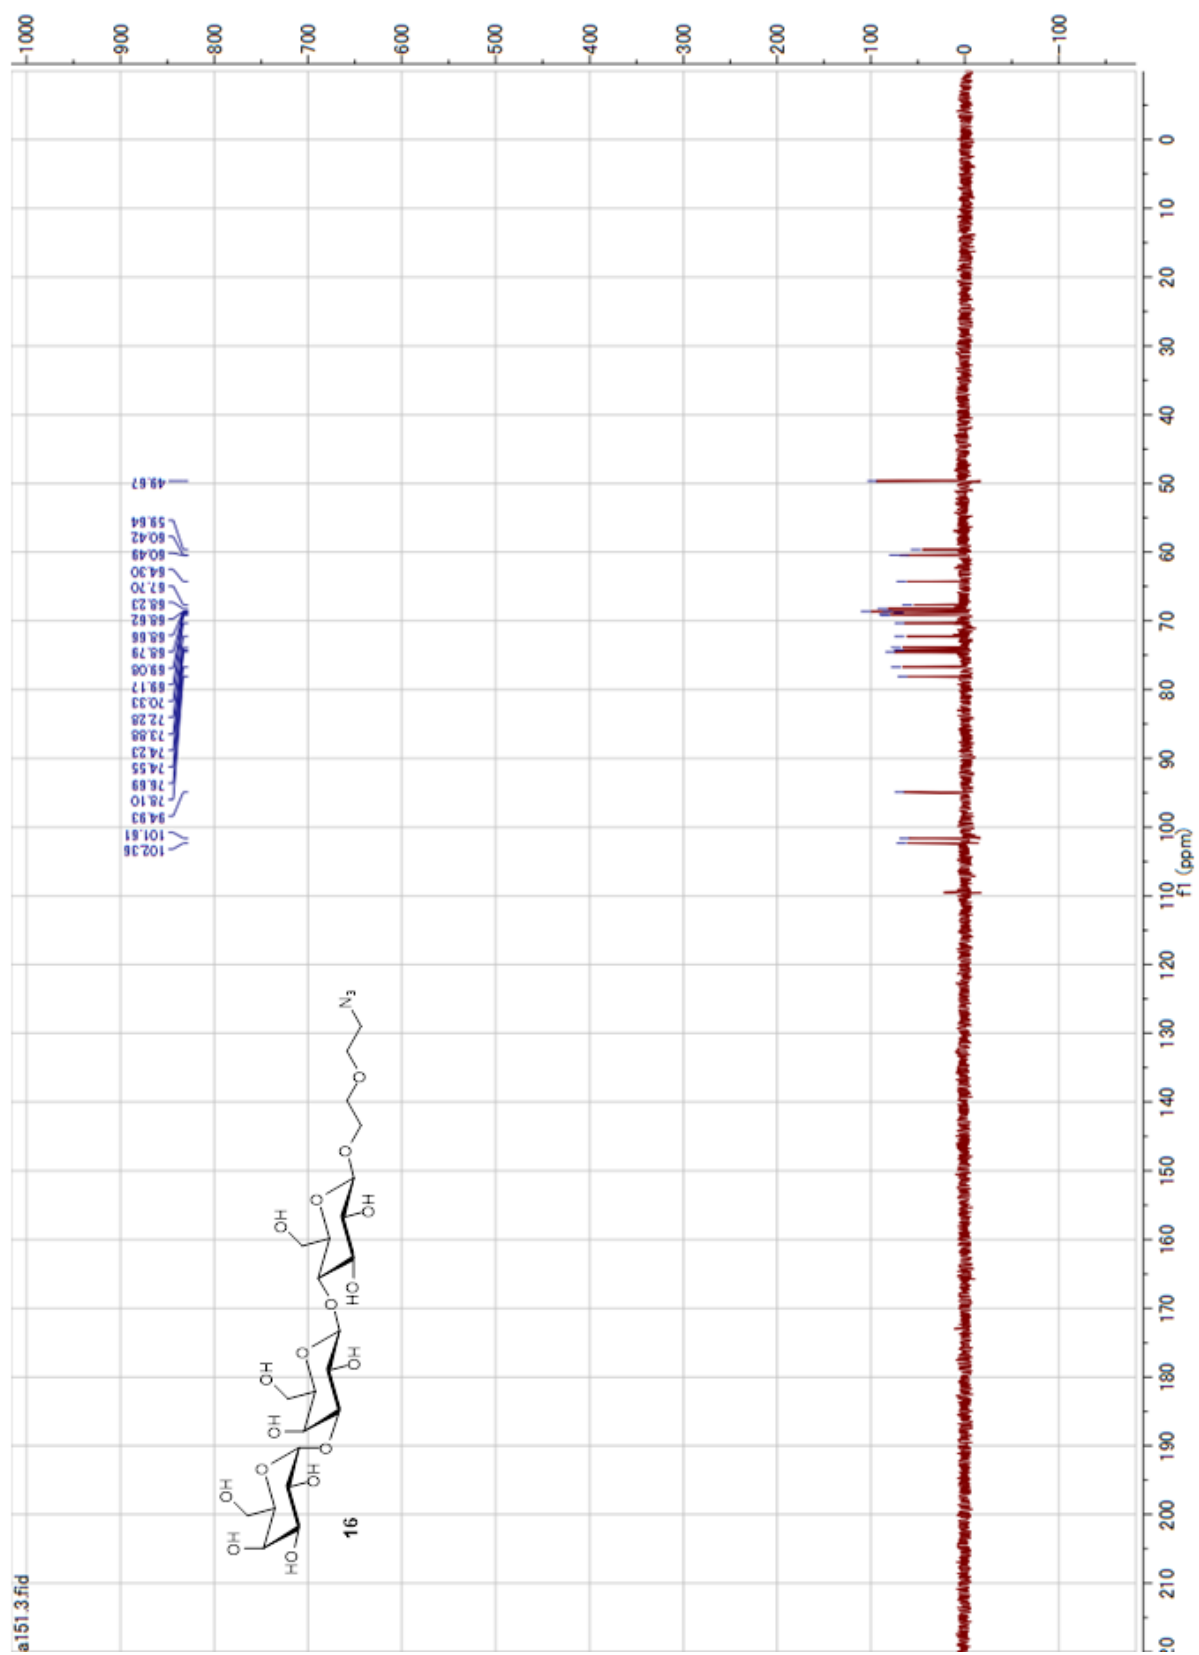



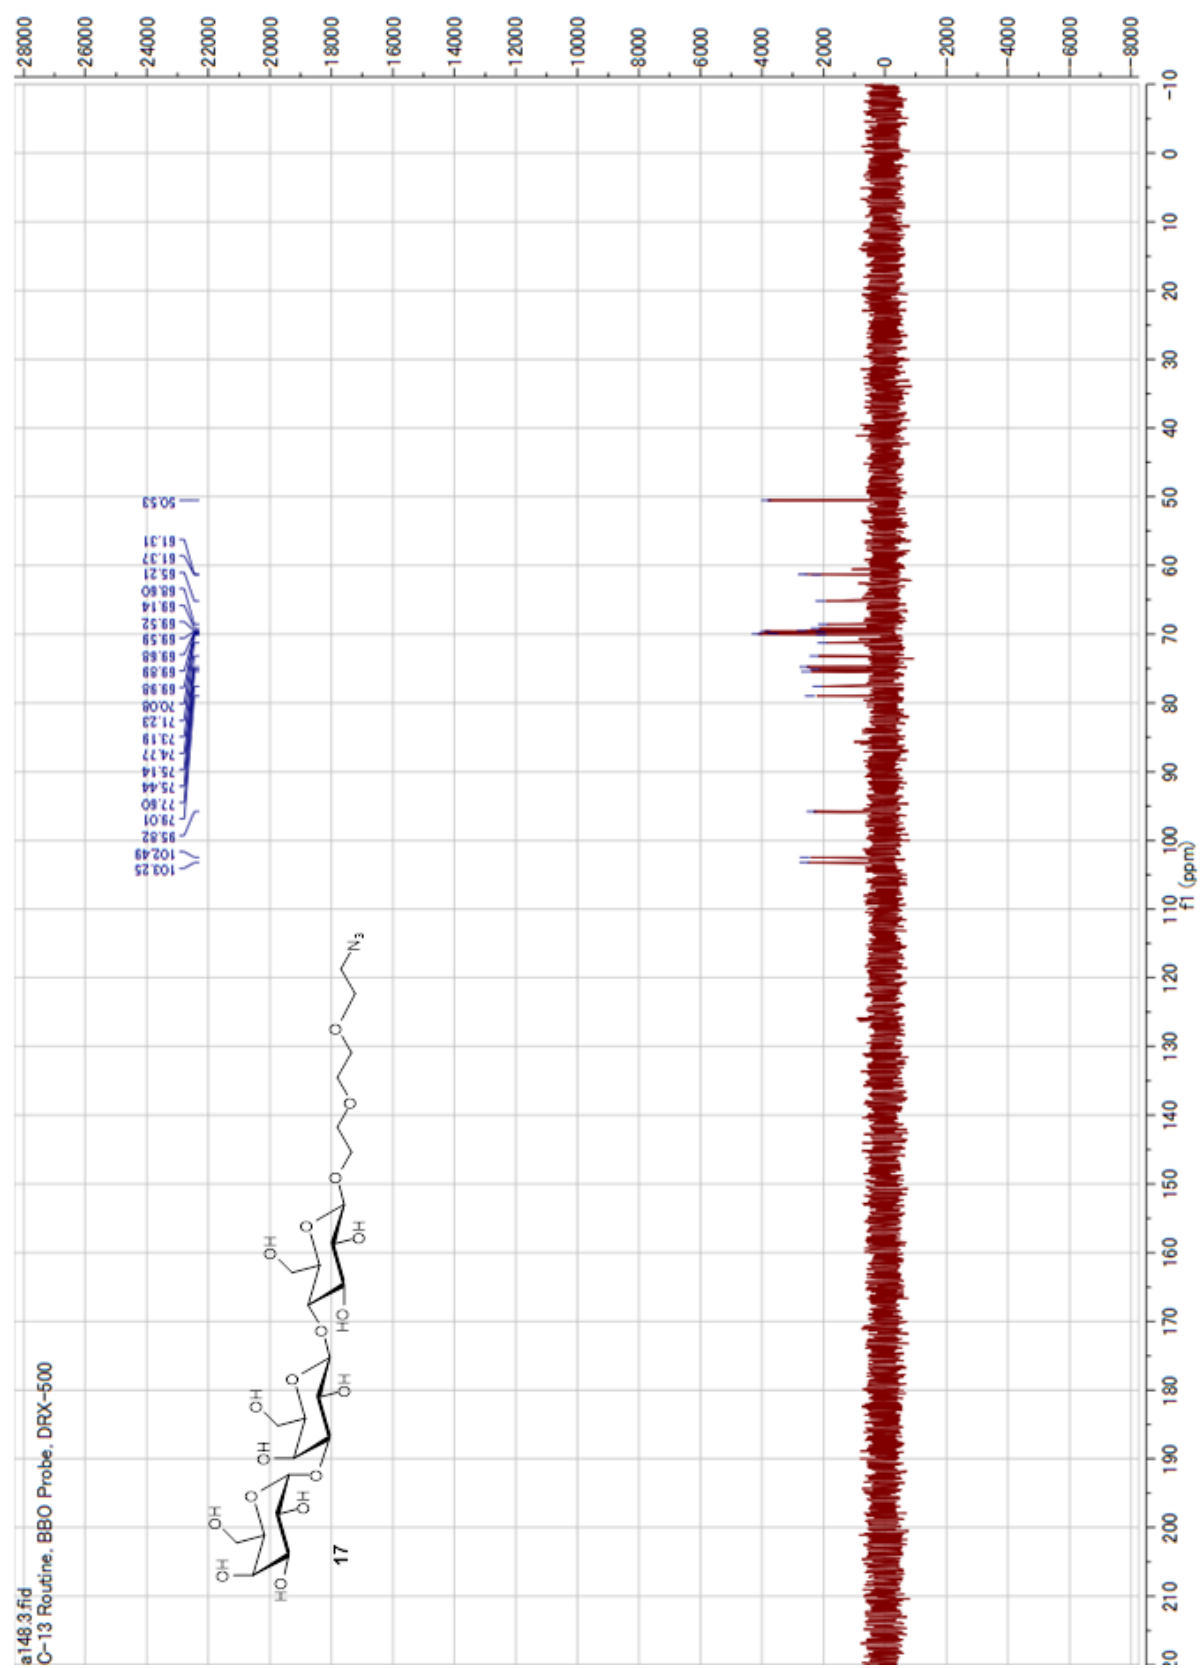

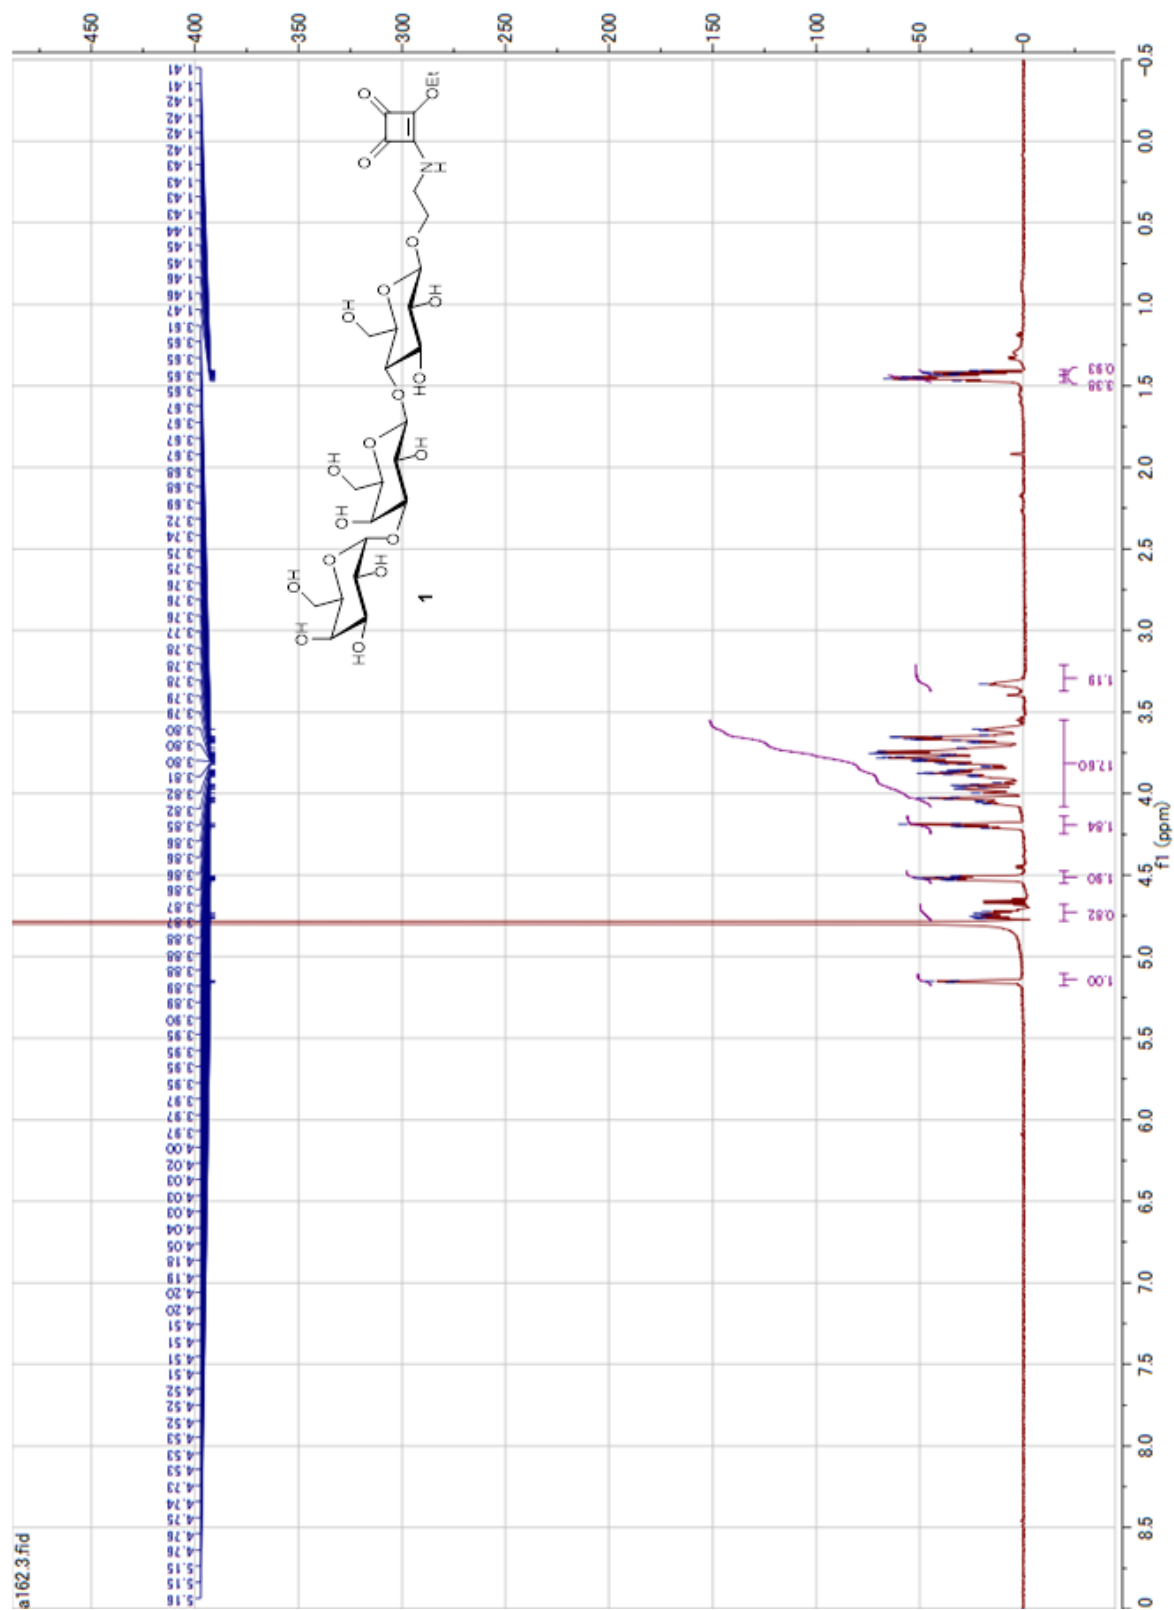

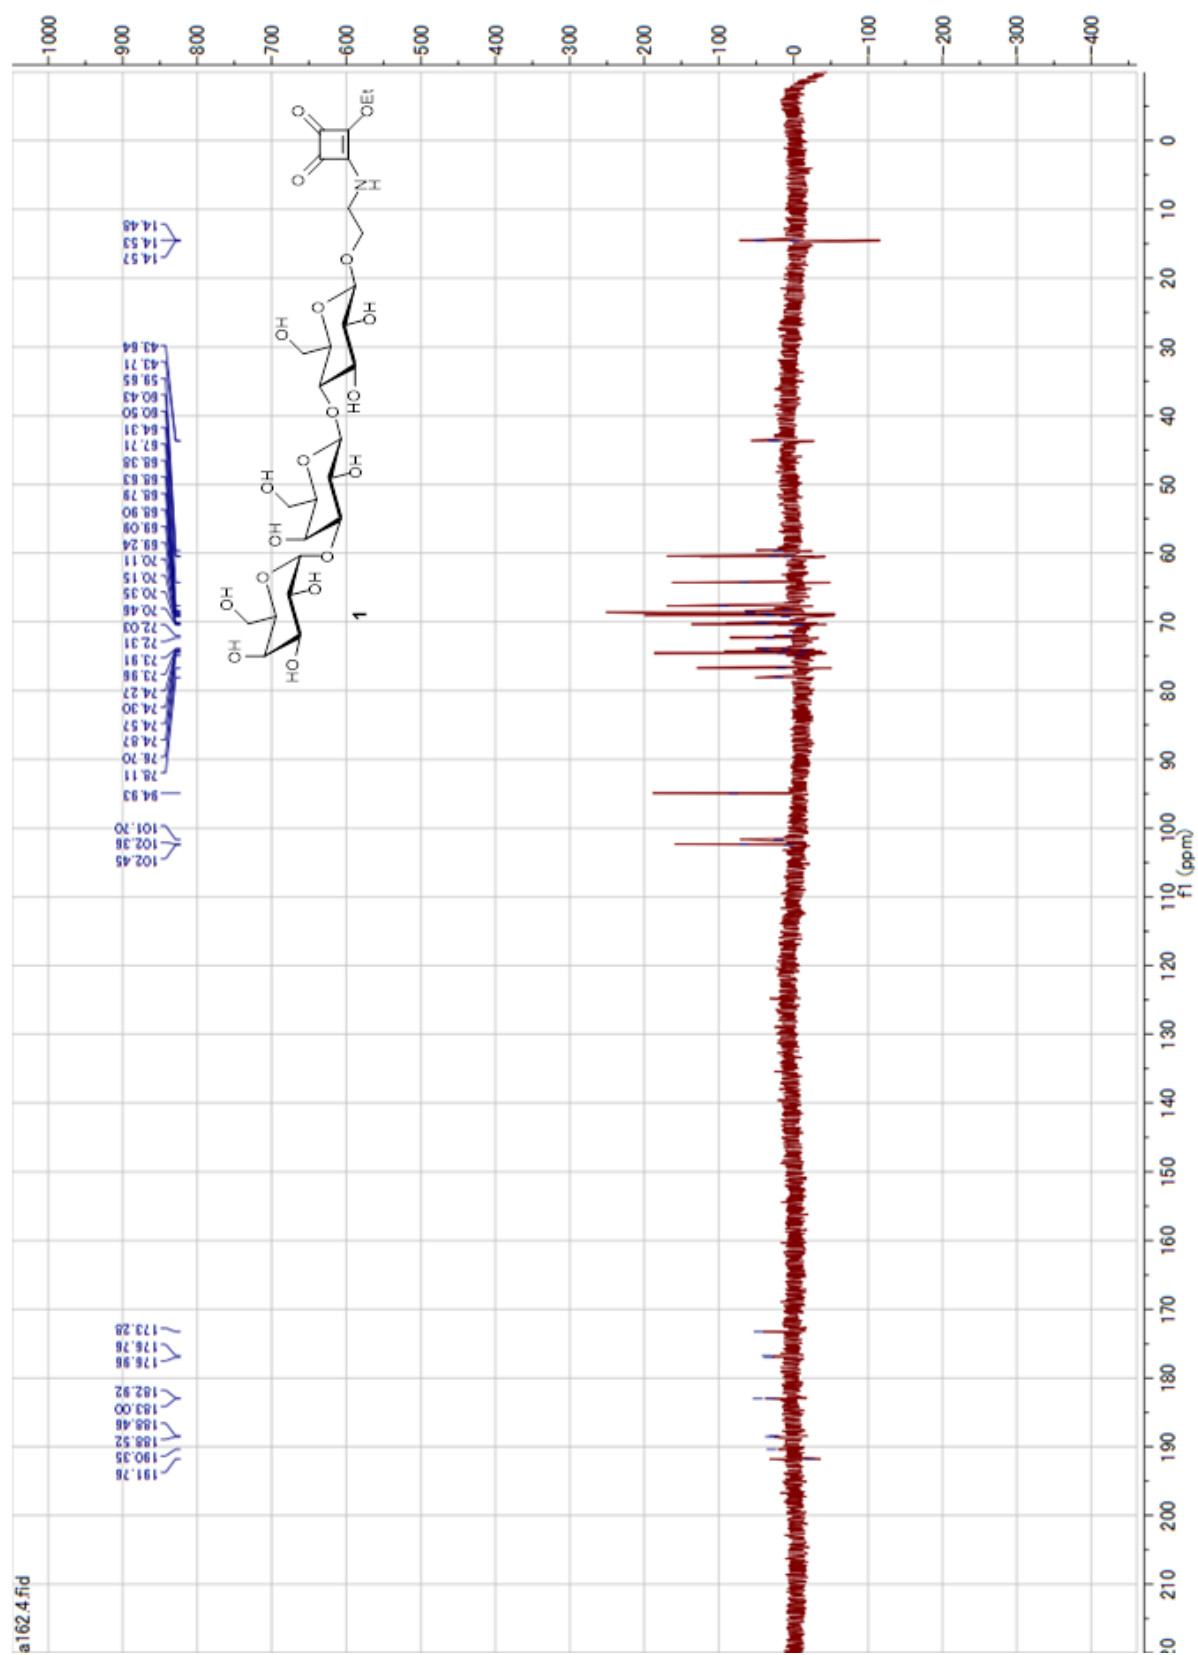

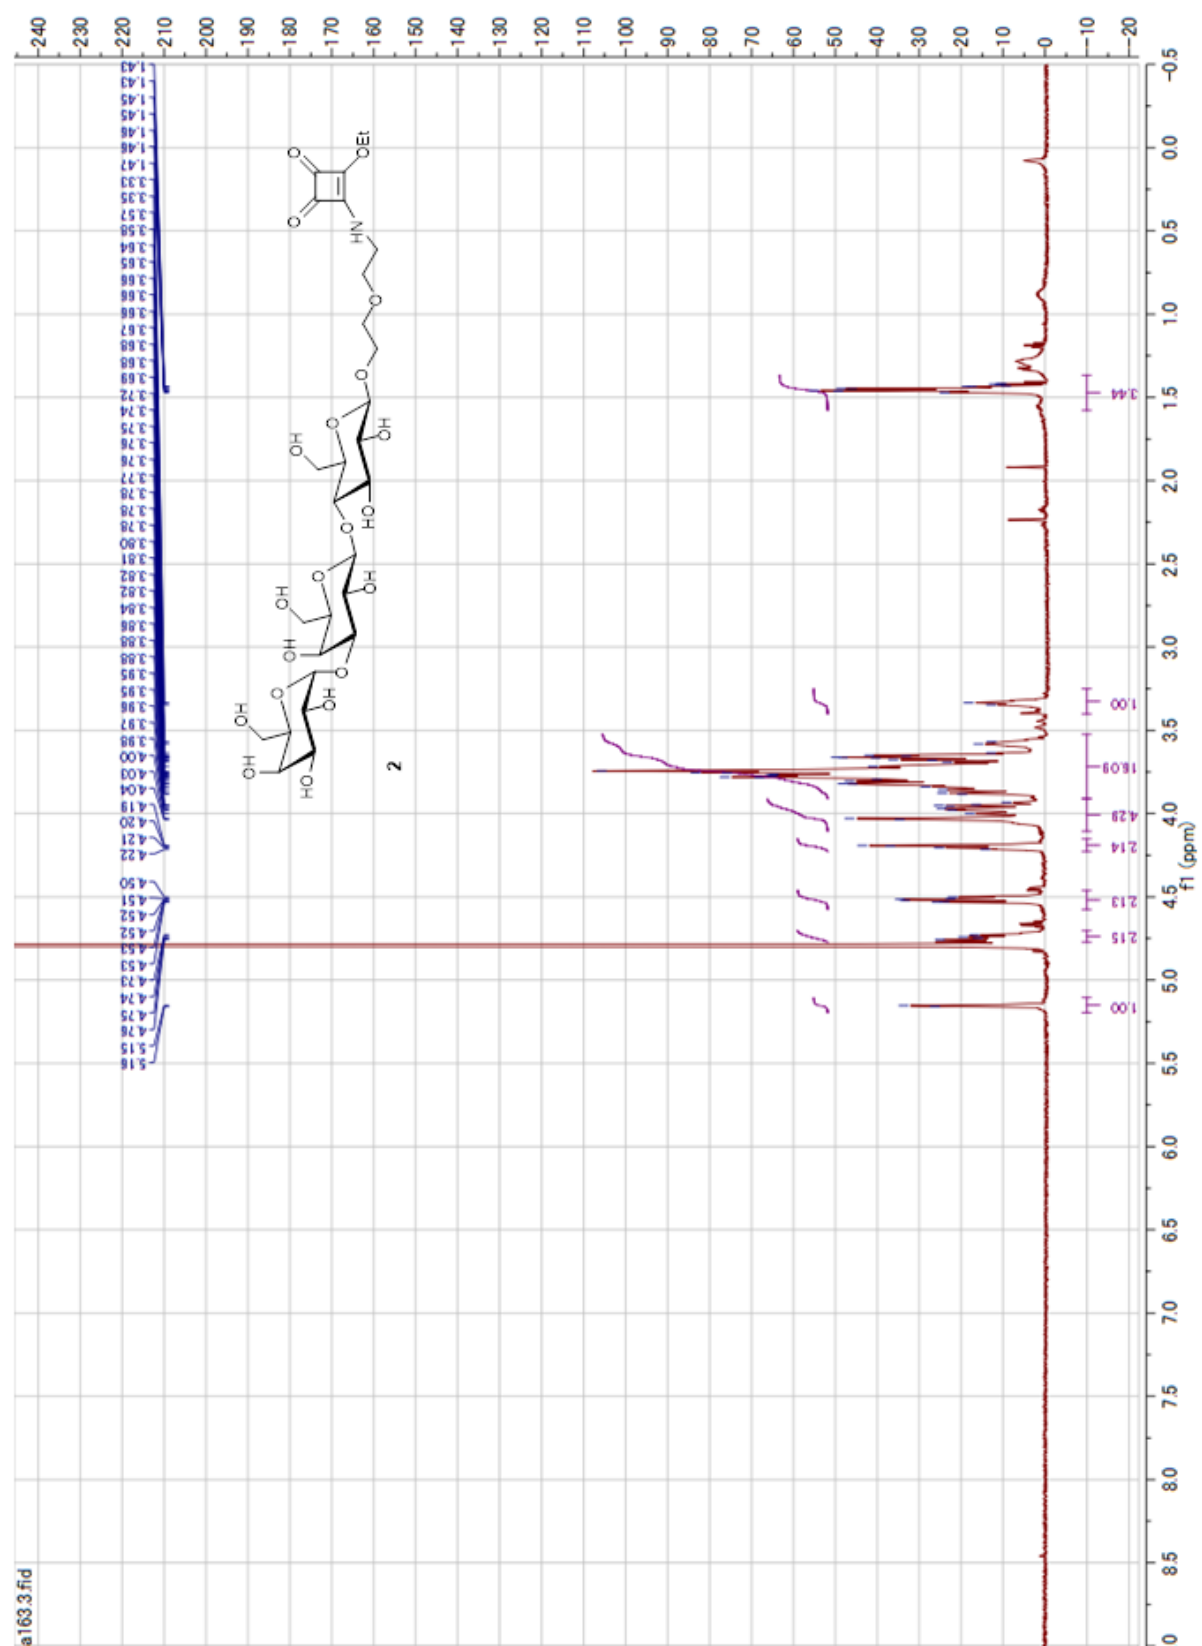



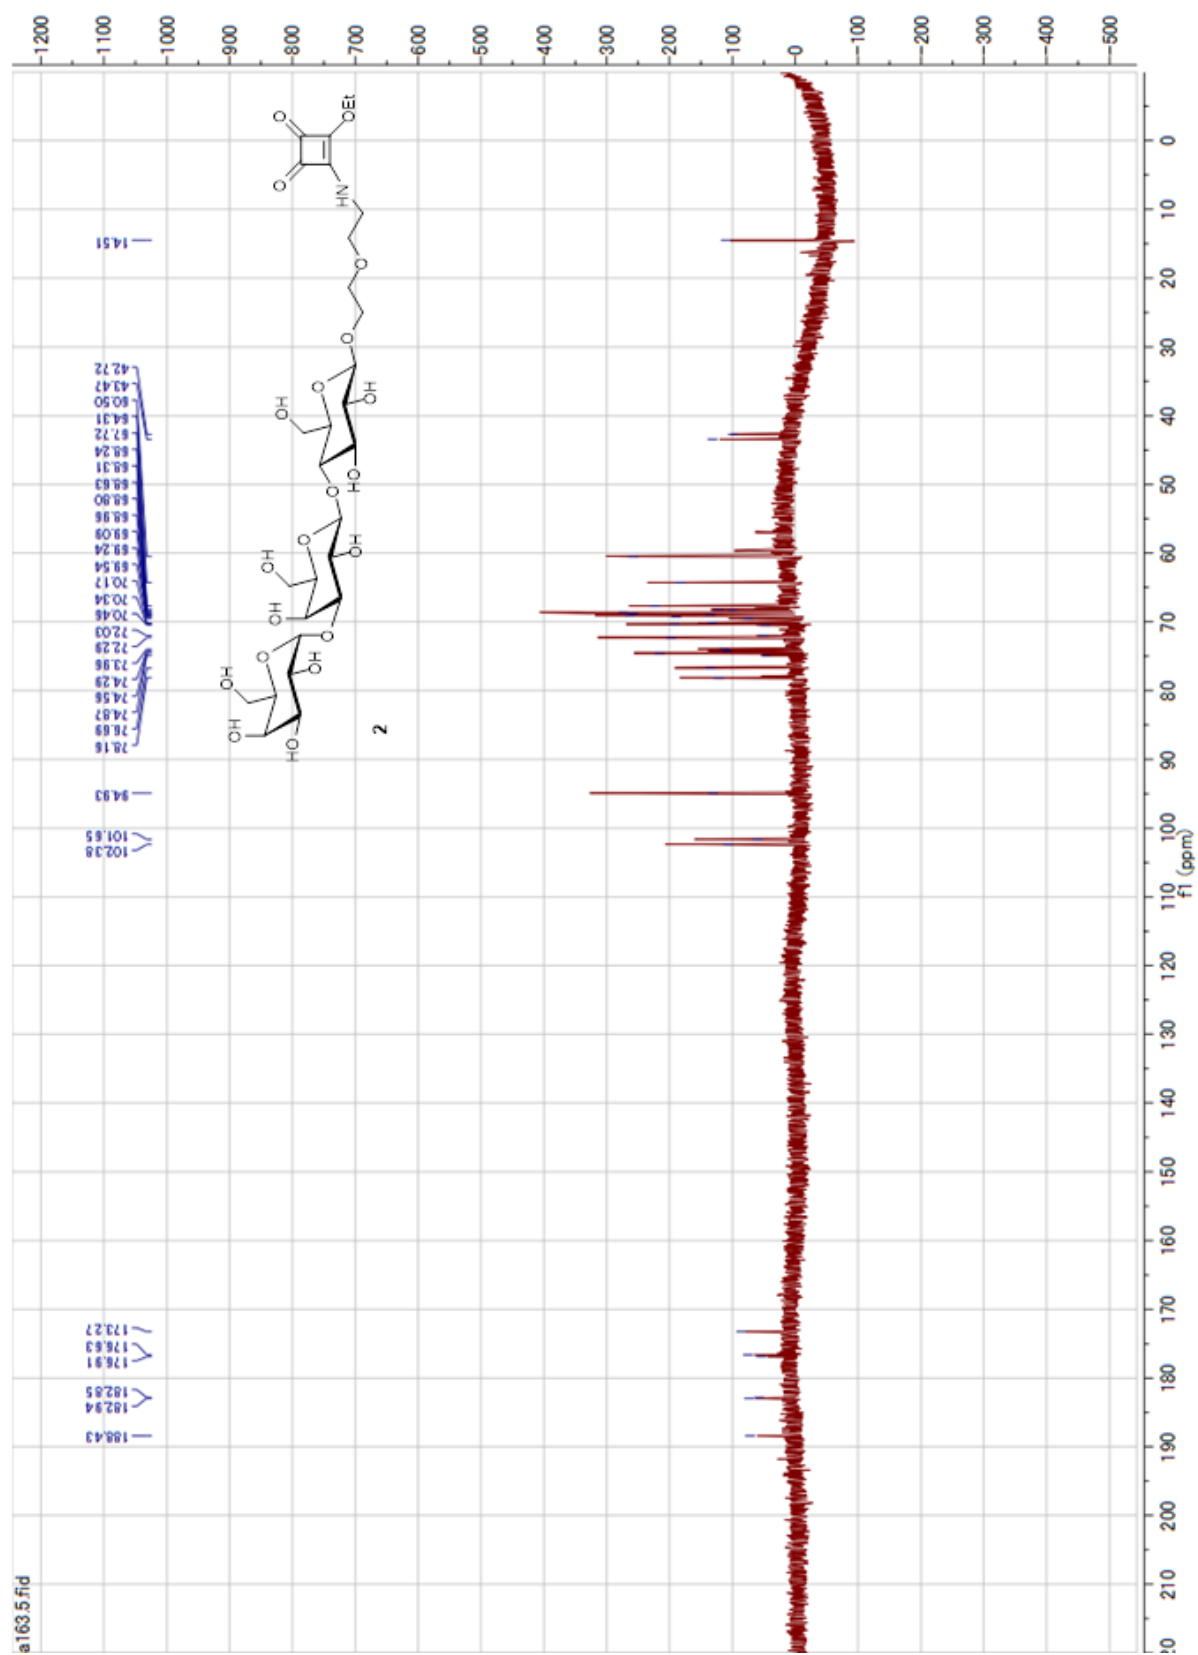

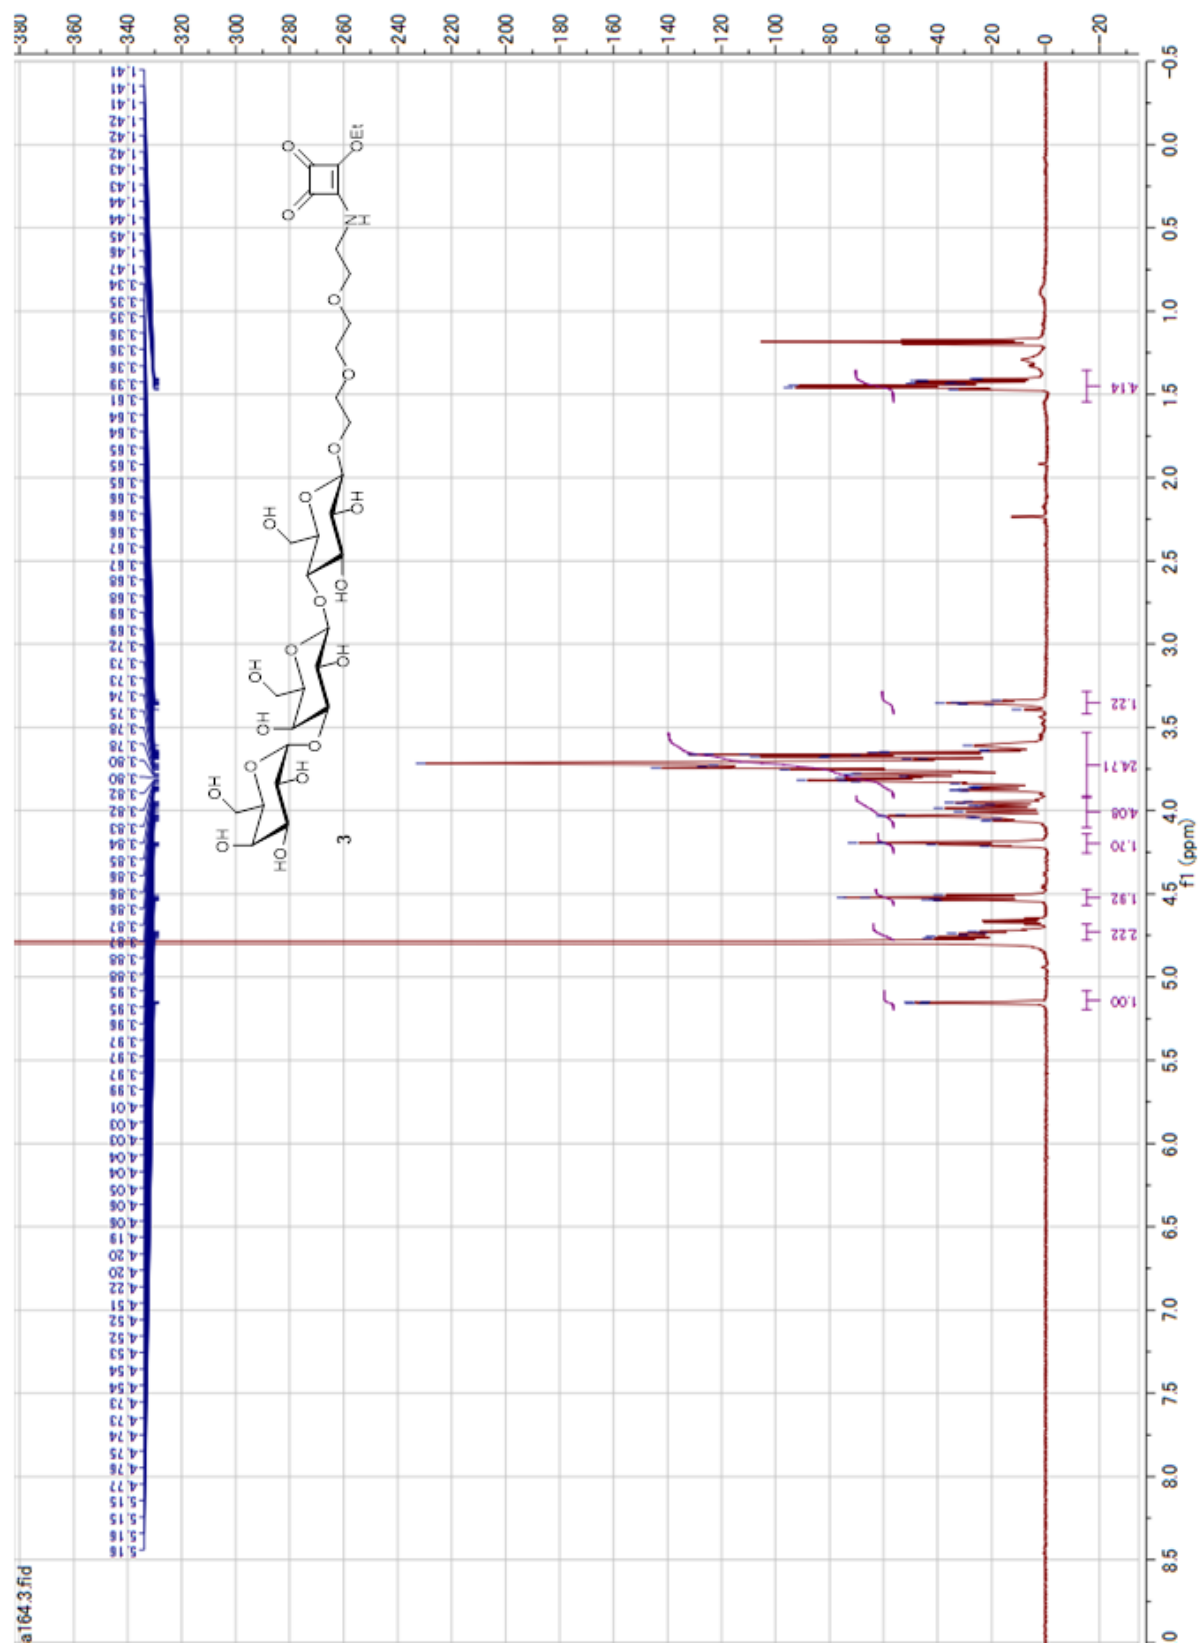

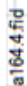

Supplement: c7ob00448f1.pdf [file c7ob00448f1.pdf]
